# Supplementary material for: Nanostructuring and macroscopic behavior of type V deep eutectic solvents based on monoterpenoids
Source: Royal Society of Chemistry journal article supplement (doi:10.1039/d1cp04509a), 2021-12-09
Supplement: d1cp04509a1.pdf [file d1cp04509a1.pdf]

## Supplementary Information

### Nanostructuring and macroscopic behavior of type V Deep Eutectic Solvents based on monoterpenoids

Lorena Zamora,<sup>a</sup> Cristina Benito,<sup>a</sup> Alberto Gutiérrez,<sup>a</sup> Rafael Alcalde,<sup>a</sup> Noor Alomari,<sup>b</sup>  
Ahmad Al Bodour,<sup>b</sup> Mert Atilhan,<sup>b\*</sup> Santiago Aparicio<sup>a\*</sup>

<sup>a</sup> Department of Chemistry, University of Burgos, 09001 Burgos, Spain

<sup>b</sup> Department of Chemical and Paper Engineering, Western Michigan University, Kalamazoo MI  
49008-5462, USA

\*Corresponding authors: [mert.atilhan@wmich.edu](mailto:mert.atilhan@wmich.edu) (M.A.) and [sapar@ubu.es](mailto:sapar@ubu.es) (S.A.)

**Table S1. Specifications of the considered chemicals.**

| chemical name                                            | molar mass<br>(g/mol) | purity (mass%) | source        | CAS<br>number |
|----------------------------------------------------------|-----------------------|----------------|---------------|---------------|
| cineole (1,3,3-Trimethyl-2-oxabicyclo[2.2.2]octane)      | 154.25                | 99.7%          | Sigma-Aldrich | 470-82-6      |
| carvone (2-Methyl-5-(prop-1-en-2-yl)cyclohex-2-en-1-one) | 150.22                | 99.7%          | Acros         | 6485-40-1     |
| menthol (2-Isopropyl-5-methylcyclohexan-1-ol)            | 156.27                | 99.6%          | Sigma-Aldrich | 2216-51-5     |
| thymol (5-Methyl-2-(propan-2-yl)phenol)                  | 150.22                | 99.6%          | Sigma-Aldrich | 89-83-8       |

**Table S2. Thermophysical properties of the studied DES as a function of temperature at atmospheric pressure.**

| CIN : MEN (1 : 1) |                     |                          |         |                 |
|-------------------|---------------------|--------------------------|---------|-----------------|
| $T / K$           | $\rho / g\ cm^{-3}$ | $10^3 \alpha_p / K_{-1}$ | $n_D$   | $\eta / mPa\ s$ |
| 293.15            | 0.91283             | 0.883                    | 1.46013 | 9.14            |
| 298.15            | 0.90889             | 0.887                    | 1.45799 | 7.04            |
| 303.15            | 0.90494             | 0.891                    | 1.45585 | 5.71            |
| 308.15            | 0.90095             | 0.895                    | 1.45370 | 4.68            |
| 313.15            | 0.89694             | 0.899                    | 1.45166 | 3.87            |
| 318.15            | 0.89289             | 0.903                    | 1.44966 | 3.20            |
| 323.15            | 0.88881             | 0.907                    | 1.44749 | 2.72            |
| 328.15            | 0.88471             | 0.911                    | —       | 2.35            |
| 333.15            | 0.88062             | 0.915                    | —       | 2.04            |
| 338.15            | —                   | —                        | —       | 1.75            |
| 343.15            | —                   | —                        | —       | 1.57            |
| 348.15            | —                   | —                        | —       | 1.41            |
| 353.15            | —                   | —                        | —       | 1.27            |
| CIN : THY (1 : 1) |                     |                          |         |                 |
| $T / K$           | $\rho / g\ cm^{-3}$ | $10^3 \alpha_p / K_{-1}$ | $n_D$   | $\eta / mPa\ s$ |
| 293.15            | 0.95975             | 0.834                    | 1.49534 | 25.1            |
| 298.15            | 0.95585             | 0.837                    | 1.49322 | 17.7            |
| 303.15            | 0.95189             | 0.840                    | 1.49111 | 12.9            |
| 308.15            | 0.94794             | 0.844                    | 1.48900 | 9.59            |
| 313.15            | 0.94394             | 0.848                    | 1.48676 | 7.31            |
| 318.15            | 0.93993             | 0.851                    | 1.48470 | 5.86            |
| 323.15            | 0.93590             | 0.855                    | 1.48252 | 4.76            |
| 328.15            | 0.93183             | 0.859                    | —       | 3.19            |
| 333.15            | 0.92774             | 0.862                    | —       | 3.29            |
| 338.15            | —                   | —                        | —       | 2.80            |
| 343.15            | —                   | —                        | —       | 2.44            |
| 348.15            | —                   | —                        | —       | 2.14            |
| 353.15            | —                   | —                        | —       | 1.90            |
| CAR : MEN (1 : 1) |                     |                          |         |                 |
| $T / K$           | $\rho / g\ cm^{-3}$ | $10^3 \alpha_p / K_{-1}$ | $n_D$   | $\eta / mPa\ s$ |
| 293.15            | 0.92782             | 0.827                    | 1.47860 | 6.24            |
| 298.15            | 0.92404             | 0.830                    | 1.47641 | 5.12            |
| 303.15            | 0.92023             | 0.834                    | 1.47427 | 4.24            |
| 308.15            | 0.91643             | 0.837                    | 1.47207 | 3.56            |
| 313.15            | 0.91261             | 0.840                    | 1.46988 | 3.02            |
| 318.15            | 0.90876             | 0.844                    | 1.46765 | 2.60            |
| 323.15            | 0.90491             | 0.848                    | 1.46542 | 2.26            |

|                   |                           |                       |         |                       |
|-------------------|---------------------------|-----------------------|---------|-----------------------|
| 328.15            | 0.90101                   | 0.851                 | —       | 1.99                  |
| 333.15            | 0.89712                   | 0.855                 | —       | 1.76                  |
| 338.15            | —                         | —                     | —       | 1.57                  |
| 343.15            | —                         | —                     | —       | 1.42                  |
| 348.15            | —                         | —                     | —       | 1.30                  |
| 353.15            | —                         | —                     | —       | 1.18                  |
| CAR : THY (1 : 1) |                           |                       |         |                       |
| $T / K$           | $\rho / \text{g cm}^{-3}$ | $10^3 \alpha_p / K_1$ | $n_D$   | $\eta / \text{mPa s}$ |
| 293.15            | 0.97309                   | 0.804                 | 1.51375 | 11.6                  |
| 298.15            | 0.96920                   | 0.807                 | 1.51178 | 8.76                  |
| 303.15            | 0.96532                   | 0.810                 | 1.50976 | 6.85                  |
| 308.15            | 0.96141                   | 0.813                 | 1.50776 | 5.55                  |
| 313.15            | 0.95752                   | 0.817                 | 1.50560 | 4.60                  |
| 318.15            | 0.95358                   | 0.820                 | 1.50339 | 3.89                  |
| 323.15            | 0.94966                   | 0.824                 | 1.50117 | 3.30                  |
| 328.15            | 0.94573                   | 0.827                 | —       | 2.84                  |
| 333.15            | 0.94184                   | 0.830                 | —       | 2.48                  |
| 338.15            | —                         | —                     | —       | 2.18                  |
| 343.15            | —                         | —                     | —       | 1.95                  |
| 348.15            | —                         | —                     | —       | 1.76                  |
| 353.15            | —                         | —                     | —       | 1.59                  |

- Uncertainty in  $\rho$ :  $\pm 1 \cdot 10^{-4} \text{ g cm}^{-3}$
- Uncertainty in  $\eta$ :  $\pm 2\%$
- Uncertainty in  $n_D$ :  $\pm 1 \cdot 10^{-5}$
- Uncertainty in  $\sigma$ : 5%
- Uncertainty in T:  $\pm 0.01 \text{ K}$
- Uncertainty in  $\alpha_p$ :  $\pm 0.001 \cdot 10^{-3} \text{ K}^{-1}$

**Table S3. Systems considered for NPT molecular dynamics simulations of for the studied DESs.  $L$  stands for the dimension of the cubic simulation boxes in the studied temperature range.**

| HBA | HBD | $N$ (HBA) | $N$ ([HBD]) | $p / \text{bar}$ | $T / K$            | $L / \text{\AA}$ |
|-----|-----|-----------|-------------|------------------|--------------------|------------------|
| CIN | MEN | 250       | 250         | 1                | 293, 313, 333, 353 | 54·54·54         |
| CIN | THY | 250       | 250         | 1                | 293, 313, 333, 353 | 54·54·54         |
| CAR | MEN | 250       | 250         | 1                | 293, 313, 333, 353 | 54·54·54         |
| CAR | THY | 250       | 250         | 1                | 293, 313, 333, 353 | 54·54·54         |

**Table S4. Forcefield parameterization for compounds studied in this work.**

The general form of the applied force field is:

$$E = \sum_{\text{bonds}} k_r (r - r_{eq})^2 + \sum_{\text{angles}} k_\theta (\theta - \theta_{eq})^2 + E_{tor} \\ + \sum_i \sum_j \left\{ 4\varepsilon_{ij} \left[ \left( \frac{\sigma_{ij}}{r_{ij}} \right)^{12} - \left( \frac{\sigma_{ij}}{r_{ij}} \right)^6 \right] + \frac{q_i q_j e^2}{4\pi\varepsilon_0 r_{ij}} \right\}$$

Dihedrals ( $E_{tor}$ ) were described according to:

$$E_{tor} = \sum_{\text{torsions}} k_\phi (1 + \cos(m\phi - \delta))$$

Improper dihedrals were described according to:

$$E_{improper} = k_\phi (\phi - \phi_0)^2$$

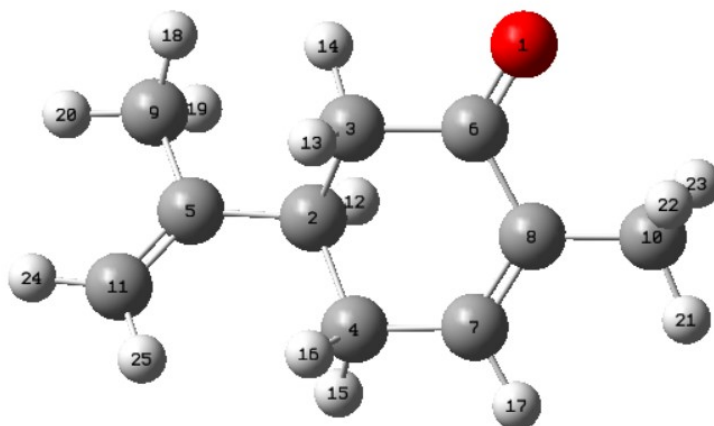

**CAR**

| label | $q$      | $\sigma_{ii} / \text{\AA}$ | $\varepsilon_{ii} / \text{kJ mol}^{-1}$ | #  |
|-------|----------|----------------------------|-----------------------------------------|----|
| Ob    | -0.54619 | 3.02905                    | 0.50208                                 | 1  |
| Cw    | 0.21819  | 3.87541                    | 0.23012                                 | 2  |
| C     | -0.45801 | 3.87541                    | 0.23012                                 | 3  |
| C     | -0.27209 | 3.87541                    | 0.23012                                 | 4  |
| C     | 0.26515  | 3.72396                    | 0.28451                                 | 5  |
| Cb    | 0.64635  | 3.56359                    | 0.46024                                 | 6  |
| C     | -0.20309 | 3.72396                    | 0.28451                                 | 7  |
| C     | 0.03985  | 3.72396                    | 0.28451                                 | 8  |
| C     | -0.46678 | 3.87541                    | 0.23012                                 | 9  |
| C     | -0.52170 | 3.87541                    | 0.23012                                 | 10 |
| C     | -0.66532 | 3.72396                    | 0.28451                                 | 11 |
| Hw    | 0.02436  | 2.35197                    | 0.09205                                 | 12 |
| H     | 0.13111  | 2.35197                    | 0.09205                                 | 13 |
| H     | 0.13371  | 2.35197                    | 0.09205                                 | 14 |
| H     | 0.10059  | 2.35197                    | 0.09205                                 | 15 |
| H     | 0.12824  | 2.35197                    | 0.09205                                 | 16 |
| H     | 0.16398  | 2.35197                    | 0.09205                                 | 17 |

|   |         |         |         |    |
|---|---------|---------|---------|----|
| H | 0.13509 | 2.35197 | 0.09205 | 18 |
| H | 0.11605 | 2.35197 | 0.09205 | 19 |
| H | 0.14098 | 2.35197 | 0.09205 | 20 |
| H | 0.13838 | 2.35197 | 0.09205 | 21 |
| H | 0.16399 | 2.35197 | 0.09205 | 22 |
| H | 0.16172 | 2.35197 | 0.09205 | 23 |
| H | 0.22992 | 2.35197 | 0.09205 | 24 |
| H | 0.19554 | 2.35197 | 0.09205 | 25 |

# Bonds

| Atom Numbers | $r_{eq} / \text{\AA}$ | $k_r / \text{kJ mol}^{-1} \text{\AA}^{-2}$ |           |
|--------------|-----------------------|--------------------------------------------|-----------|
| 19           | 9                     | 1.093                                      | 1435.0745 |
| 23           | 10                    | 1.093                                      | 1435.0745 |
| 12           | 2                     | 1.093                                      | 1435.0745 |
| 9            | 18                    | 1.093                                      | 1435.0745 |
| 9            | 20                    | 1.093                                      | 1435.0745 |
| 9            | 5                     | 1.482                                      | 1366.7245 |
| 1            | 6                     | 1.222                                      | 3899.333  |
| 14           | 3                     | 1.093                                      | 1435.0745 |
| 10           | 21                    | 1.093                                      | 1435.0745 |
| 10           | 8                     | 1.482                                      | 1366.7245 |
| 10           | 22                    | 1.093                                      | 1435.0745 |
| 6            | 8                     | 1.468                                      | 1374.553  |
| 6            | 3                     | 1.492                                      | 1261.639  |
| 2            | 5                     | 1.482                                      | 1366.7245 |
| 2            | 3                     | 1.508                                      | 1282.1115 |
| 2            | 4                     | 1.508                                      | 1282.1115 |
| 8            | 7                     | 1.333                                      | 2862.019  |
| 5            | 11                    | 1.333                                      | 2862.019  |
| 3            | 13                    | 1.093                                      | 1435.0745 |
| 15           | 4                     | 1.093                                      | 1435.0745 |
| 7            | 17                    | 1.083                                      | 1556.724  |
| 7            | 4                     | 1.482                                      | 1366.7245 |
| 4            | 16                    | 1.093                                      | 1435.0745 |
| 11           | 24                    | 1.083                                      | 1556.724  |
| 11           | 25                    | 1.083                                      | 1556.724  |

# Angles

| Atom Numbers | $\theta_{eq} / \text{deg}$ | $k_{\theta} / \text{kJ mol}^{-1} \text{rad}^{-2}$ |         |        |
|--------------|----------------------------|---------------------------------------------------|---------|--------|
| 3            | 2                          | 4                                                 | 109.608 | 512.48 |
| 3            | 2                          | 5                                                 | 109.445 | 443.23 |
| 3            | 2                          | 12                                                | 110.549 | 383    |
| 4            | 2                          | 5                                                 | 109.445 | 443.23 |
| 4            | 2                          | 12                                                | 110.549 | 383    |
| 5            | 2                          | 12                                                | 110.292 | 380.59 |
| 2            | 3                          | 6                                                 | 107.517 | 467.91 |
| 2            | 3                          | 13                                                | 110.549 | 383    |
| 2            | 3                          | 14                                                | 110.549 | 383    |
| 6            | 3                          | 13                                                | 108.385 | 391.44 |
| 6            | 3                          | 14                                                | 108.385 | 391.44 |
| 13           | 3                          | 14                                                | 108.836 | 310.74 |
| 2            | 4                          | 7                                                 | 109.445 | 443.23 |
| 2            | 4                          | 15                                                | 110.549 | 383    |
| 2            | 4                          | 16                                                | 110.549 | 383    |
| 7            | 4                          | 15                                                | 110.292 | 380.59 |
| 7            | 4                          | 16                                                | 110.292 | 380.59 |
| 15           | 4                          | 16                                                | 108.836 | 310.74 |
| 2            | 5                          | 9                                                 | 118.043 | 452.86 |
| 2            | 5                          | 11                                                | 122.141 | 404.68 |
| 9            | 5                          | 11                                                | 122.141 | 404.68 |
| 1            | 6                          | 3                                                 | 124.41  | 564.87 |
| 1            | 6                          | 8                                                 | 122.623 | 563.67 |
| 3            | 6                          | 8                                                 | 116.853 | 666.04 |
| 4            | 7                          | 8                                                 | 122.141 | 404.68 |
| 4            | 7                          | 17                                                | 120.108 | 268.59 |
| 8            | 7                          | 17                                                | 121.004 | 322.18 |
| 6            | 8                          | 7                                                 | 111.297 | 328.2  |
| 6            | 8                          | 10                                                | 116.104 | 420.34 |
| 7            | 8                          | 10                                                | 122.141 | 404.68 |
| 5            | 9                          | 18                                                | 110.292 | 380.59 |
| 5            | 9                          | 19                                                | 110.292 | 380.59 |
| 5            | 9                          | 20                                                | 110.292 | 380.59 |
| 18           | 9                          | 19                                                | 108.836 | 310.74 |
| 18           | 9                          | 20                                                | 108.836 | 310.74 |
| 19           | 9                          | 20                                                | 108.836 | 310.74 |
| 8            | 10                         | 21                                                | 110.292 | 380.59 |
| 8            | 10                         | 22                                                | 110.292 | 380.59 |

|    |    |    |         |        |
|----|----|----|---------|--------|
| 8  | 10 | 23 | 110.292 | 380.59 |
| 21 | 10 | 22 | 108.836 | 310.74 |
| 21 | 10 | 23 | 108.836 | 310.74 |
| 22 | 10 | 23 | 108.836 | 310.74 |
| 5  | 11 | 24 | 121.004 | 322.18 |
| 5  | 11 | 25 | 121.004 | 322.18 |
| 24 | 11 | 25 | 119.523 | 219.8  |

# Dihedrals

|   | Atom Numbers |    |    | $\delta$ / deg | $k_{\phi}$ / kJ mol <sup>-1</sup> | m |
|---|--------------|----|----|----------------|-----------------------------------|---|
| 1 | 6            | 3  | 2  | 0              | 1.7238                            | 1 |
| 1 | 6            | 3  | 2  | 180            | 0.2929                            | 2 |
| 1 | 6            | 3  | 2  | 0              | 0.682                             | 3 |
| 1 | 6            | 3  | 13 | 0              | 1.3807                            | 1 |
| 1 | 6            | 3  | 13 | 180            | -2.9455                           | 2 |
| 1 | 6            | 3  | 13 | 0              | 0.6443                            | 3 |
| 1 | 6            | 3  | 14 | 0              | 1.3807                            | 1 |
| 1 | 6            | 3  | 14 | 180            | -2.9455                           | 2 |
| 1 | 6            | 3  | 14 | 0              | 0.6443                            | 3 |
| 1 | 6            | 8  | 7  | 0              | 0.7573                            | 1 |
| 1 | 6            | 8  | 7  | 180            | 4.138                             | 2 |
| 1 | 6            | 8  | 10 | 0              | -0.841                            | 1 |
| 1 | 6            | 8  | 10 | 180            | 4.2426                            | 2 |
| 1 | 6            | 8  | 10 | 0              | -0.6653                           | 3 |
| 2 | 3            | 6  | 8  | 180            | 0.8368                            | 2 |
| 2 | 3            | 6  | 8  | 0              | 0.6276                            | 3 |
| 2 | 4            | 7  | 8  | 0              | -1.0334                           | 1 |
| 2 | 4            | 7  | 8  | 180            | 0.5732                            | 2 |
| 2 | 4            | 7  | 8  | 0              | -1.318                            | 3 |
| 2 | 4            | 7  | 17 | 0              | 0.1548                            | 1 |
| 2 | 4            | 7  | 17 | 0              | 0.7489                            | 3 |
| 2 | 5            | 9  | 18 | 180            | -0.3849                           | 2 |
| 2 | 5            | 9  | 18 | 0              | 0.4602                            | 3 |
| 2 | 5            | 9  | 19 | 180            | -0.3849                           | 2 |
| 2 | 5            | 9  | 19 | 0              | 0.4602                            | 3 |
| 2 | 5            | 9  | 20 | 180            | -0.3849                           | 2 |
| 2 | 5            | 9  | 20 | 0              | 0.4602                            | 3 |
| 2 | 5            | 11 | 24 | 180            | 25.104                            | 2 |
| 2 | 5            | 11 | 25 | 180            | 25.104                            | 2 |
| 3 | 2            | 4  | 7  | 0              | -0.615                            | 1 |
| 3 | 2            | 4  | 7  | 180            | 0.9163                            | 2 |
| 3 | 2            | 4  | 7  | 0              | 1.2217                            | 3 |
| 3 | 2            | 4  | 15 | 0              | 1.3389                            | 1 |
| 3 | 2            | 4  | 15 | 180            | -1.318                            | 2 |
| 3 | 2            | 4  | 15 | 0              | 0.5523                            | 3 |
| 3 | 2            | 4  | 16 | 0              | 1.3389                            | 1 |
| 3 | 2            | 4  | 16 | 180            | -1.318                            | 2 |
| 3 | 2            | 4  | 16 | 0              | 0.5523                            | 3 |
| 3 | 2            | 5  | 9  | 0              | 0.8745                            | 1 |
| 3 | 2            | 5  | 9  | 180            | 0.6192                            | 2 |
| 3 | 2            | 5  | 9  | 0              | 0.5899                            | 3 |
| 3 | 2            | 5  | 11 | 0              | -1.0334                           | 1 |
| 3 | 2            | 5  | 11 | 180            | 0.5732                            | 2 |
| 3 | 2            | 5  | 11 | 0              | -1.318                            | 3 |
| 3 | 6            | 8  | 7  | 0              | -0.682                            | 1 |
| 3 | 6            | 8  | 7  | 180            | 3.2468                            | 2 |
| 3 | 6            | 8  | 7  | 0              | -1.0167                           | 3 |
| 3 | 6            | 8  | 10 | 0              | 0.2845                            | 1 |
| 3 | 6            | 8  | 10 | 180            | 3.7614                            | 2 |
| 3 | 6            | 8  | 10 | 0              | 1.318                             | 3 |
| 4 | 2            | 3  | 6  | 0              | 0.1381                            | 1 |
| 4 | 2            | 3  | 6  | 180            | -0.3264                           | 2 |
| 4 | 2            | 3  | 6  | 0              | 0.2971                            | 3 |
| 4 | 2            | 3  | 13 | 0              | 1.3389                            | 1 |
| 4 | 2            | 3  | 13 | 180            | -1.318                            | 2 |
| 4 | 2            | 3  | 13 | 0              | 0.5523                            | 3 |
| 4 | 2            | 3  | 14 | 0              | 1.3389                            | 1 |
| 4 | 2            | 3  | 14 | 180            | -1.318                            | 2 |
| 4 | 2            | 3  | 14 | 0              | 0.5523                            | 3 |
| 4 | 2            | 5  | 9  | 0              | 0.8745                            | 1 |
| 4 | 2            | 5  | 9  | 180            | 0.6192                            | 2 |
| 4 | 2            | 5  | 9  | 0              | 0.5899                            | 3 |
| 4 | 2            | 5  | 11 | 0              | -1.0334                           | 1 |
| 4 | 2            | 5  | 11 | 180            | 0.5732                            | 2 |
| 4 | 2            | 5  | 11 | 0              | -1.318                            | 3 |
| 4 | 7            | 8  | 6  | 180            | 25.104                            | 2 |

|    |   |    |    |     |         |   |
|----|---|----|----|-----|---------|---|
| 4  | 7 | 8  | 10 | 0   | -0.8452 | 1 |
| 4  | 7 | 8  | 10 | 180 | 25.104  | 2 |
| 5  | 2 | 3  | 6  | 0   | 0.6276  | 3 |
| 5  | 2 | 3  | 13 | 0   | 0.6736  | 1 |
| 5  | 2 | 3  | 13 | 180 | -0.8577 | 2 |
| 5  | 2 | 3  | 13 | 0   | 0.3012  | 3 |
| 5  | 2 | 3  | 14 | 0   | 0.6736  | 1 |
| 5  | 2 | 3  | 14 | 180 | -0.8577 | 2 |
| 5  | 2 | 3  | 14 | 0   | 0.3012  | 3 |
| 5  | 2 | 4  | 7  | 0   | 0.6276  | 3 |
| 5  | 2 | 4  | 15 | 0   | 0.6736  | 1 |
| 5  | 2 | 4  | 15 | 180 | -0.8577 | 2 |
| 5  | 2 | 4  | 15 | 0   | 0.3012  | 3 |
| 5  | 2 | 4  | 16 | 0   | 0.6736  | 1 |
| 5  | 2 | 4  | 16 | 180 | -0.8577 | 2 |
| 5  | 2 | 4  | 16 | 0   | 0.3012  | 3 |
| 6  | 3 | 2  | 12 | 0   | -0.5356 | 1 |
| 6  | 3 | 2  | 12 | 180 | 0.1213  | 2 |
| 6  | 8 | 7  | 17 | 180 | 3.7656  | 2 |
| 6  | 8 | 10 | 21 | 0   | -0.2259 | 3 |
| 6  | 8 | 10 | 22 | 0   | -0.2259 | 3 |
| 6  | 8 | 10 | 23 | 0   | -0.2259 | 3 |
| 7  | 4 | 2  | 12 | 0   | 0.6736  | 1 |
| 7  | 4 | 2  | 12 | 180 | -0.8577 | 2 |
| 7  | 4 | 2  | 12 | 0   | 0.3012  | 3 |
| 7  | 8 | 10 | 21 | 0   | 1.0502  | 1 |
| 7  | 8 | 10 | 21 | 180 | -0.8577 | 2 |
| 7  | 8 | 10 | 21 | 0   | -1.1213 | 3 |
| 7  | 8 | 10 | 22 | 0   | 1.0502  | 1 |
| 7  | 8 | 10 | 22 | 180 | -0.8577 | 2 |
| 7  | 8 | 10 | 22 | 0   | -1.1213 | 3 |
| 7  | 8 | 10 | 23 | 0   | 1.0502  | 1 |
| 7  | 8 | 10 | 23 | 180 | -0.8577 | 2 |
| 7  | 8 | 10 | 23 | 0   | -1.1213 | 3 |
| 8  | 6 | 3  | 13 | 0   | 0.2427  | 3 |
| 8  | 6 | 3  | 14 | 0   | 0.2427  | 3 |
| 8  | 7 | 4  | 15 | 0   | 1.0502  | 1 |
| 8  | 7 | 4  | 15 | 180 | -0.8577 | 2 |
| 8  | 7 | 4  | 15 | 0   | -1.1213 | 3 |
| 8  | 7 | 4  | 16 | 0   | 1.0502  | 1 |
| 8  | 7 | 4  | 16 | 180 | -0.8577 | 2 |
| 8  | 7 | 4  | 16 | 0   | -1.1213 | 3 |
| 9  | 5 | 2  | 12 | 180 | -0.3849 | 2 |
| 9  | 5 | 2  | 12 | 0   | 0.4602  | 3 |
| 9  | 5 | 11 | 24 | 180 | 25.104  | 2 |
| 9  | 5 | 11 | 25 | 180 | 25.104  | 2 |
| 10 | 8 | 7  | 17 | 180 | 25.104  | 2 |
| 11 | 5 | 2  | 12 | 0   | 1.0502  | 1 |
| 11 | 5 | 2  | 12 | 180 | -0.8577 | 2 |
| 11 | 5 | 2  | 12 | 0   | -1.1213 | 3 |
| 11 | 5 | 9  | 18 | 0   | 1.0502  | 1 |
| 11 | 5 | 9  | 18 | 180 | -0.8577 | 2 |
| 11 | 5 | 9  | 18 | 0   | -1.1213 | 3 |
| 11 | 5 | 9  | 19 | 0   | 1.0502  | 1 |
| 11 | 5 | 9  | 19 | 180 | -0.8577 | 2 |
| 11 | 5 | 9  | 19 | 0   | -1.1213 | 3 |
| 11 | 5 | 9  | 20 | 0   | 1.0502  | 1 |
| 11 | 5 | 9  | 20 | 180 | -0.8577 | 2 |
| 11 | 5 | 9  | 20 | 0   | -1.1213 | 3 |
| 12 | 2 | 3  | 13 | 0   | 0.5941  | 1 |
| 12 | 2 | 3  | 13 | 180 | -2.8995 | 2 |
| 12 | 2 | 3  | 13 | 0   | 0.6569  | 3 |
| 12 | 2 | 3  | 14 | 0   | 0.5941  | 1 |
| 12 | 2 | 3  | 14 | 180 | -2.8995 | 2 |
| 12 | 2 | 3  | 14 | 0   | 0.6569  | 3 |
| 12 | 2 | 4  | 15 | 0   | 0.5941  | 1 |
| 12 | 2 | 4  | 15 | 180 | -2.8995 | 2 |
| 12 | 2 | 4  | 15 | 0   | 0.6569  | 3 |
| 12 | 2 | 4  | 16 | 0   | 0.5941  | 1 |
| 12 | 2 | 4  | 16 | 180 | -2.8995 | 2 |
| 12 | 2 | 4  | 16 | 0   | 0.6569  | 3 |
| 15 | 4 | 7  | 17 | 0   | -1.0962 | 1 |
| 15 | 4 | 7  | 17 | 180 | -0.477  | 2 |
| 15 | 4 | 7  | 17 | 0   | 0.4351  | 3 |
| 16 | 4 | 7  | 17 | 0   | -1.0962 | 1 |
| 16 | 4 | 7  | 17 | 180 | -0.477  | 2 |

16      4      7      17      0      0.4351      3

# Improper

|    | Atom Numbers |   |    | $\phi_0 / \text{deg}$ | $k_\phi / \text{kJ mol}^{-1}$ |
|----|--------------|---|----|-----------------------|-------------------------------|
| 6  | 3            | 1 | 8  | 0                     | 83.1026                       |
| 3  | 2            | 6 | 14 | 0                     | 0                             |
| 3  | 14           | 6 | 13 | 0                     | 0                             |
| 2  | 5            | 3 | 4  | 0                     | 0                             |
| 2  | 5            | 3 | 12 | 0                     | 0                             |
| 8  | 10           | 6 | 7  | 0                     | 15.6565                       |
| 5  | 9            | 2 | 11 | 0                     | 18.0665                       |
| 4  | 7            | 2 | 15 | 0                     | 0                             |
| 4  | 15           | 2 | 16 | 0                     | 0                             |
| 7  | 4            | 8 | 17 | 0                     | 7.8324                        |
| 9  | 19           | 5 | 18 | 0                     | 0                             |
| 9  | 19           | 5 | 20 | 0                     | 0                             |
| 10 | 23           | 8 | 21 | 0                     | 0                             |
| 10 | 23           | 8 | 22 | 0                     | 0                             |
| 11 | 24           | 5 | 25 | 0                     | 3.615                         |

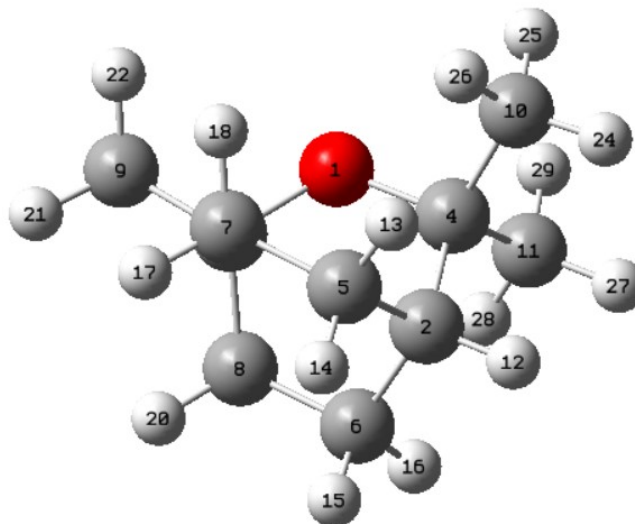

### CIN

| label | $q$      | $\sigma_{ii} / \text{\AA}$ | $\epsilon_{ii} / \text{kJ mol}^{-1}$ | #  |
|-------|----------|----------------------------|--------------------------------------|----|
| Ot    | -0.72761 | 3.15378                    | 0.63639                              | 1  |
| C     | -0.08927 | 3.87541                    | 0.23012                              | 2  |
| Ct    | 0.75687  | 3.87541                    | 0.23012                              | 3  |
| Ct    | 1.04073  | 3.87541                    | 0.23012                              | 4  |
| C     | -0.08549 | 3.87541                    | 0.23012                              | 5  |
| C     | -0.08738 | 3.87541                    | 0.23012                              | 6  |
| C     | -0.18232 | 3.87541                    | 0.23012                              | 7  |
| C     | -0.18023 | 3.87541                    | 0.23012                              | 8  |
| C     | -0.63026 | 3.87541                    | 0.23012                              | 9  |
| C     | -0.70350 | 3.87541                    | 0.23012                              | 10 |
| C     | -0.70845 | 3.87541                    | 0.23012                              | 11 |
| H     | -0.00540 | 2.35197                    | 0.09205                              | 12 |
| H     | 0.01879  | 2.35197                    | 0.09205                              | 13 |
| H     | 0.04321  | 2.35197                    | 0.09205                              | 14 |
| H     | 0.04397  | 2.35197                    | 0.09205                              | 15 |
| H     | 0.01897  | 2.35197                    | 0.09205                              | 16 |
| H     | 0.03083  | 2.35197                    | 0.09205                              | 17 |
| H     | 0.03650  | 2.35197                    | 0.09205                              | 18 |
| H     | 0.03537  | 2.35197                    | 0.09205                              | 19 |
| H     | 0.03065  | 2.35197                    | 0.09205                              | 20 |
| H     | 0.11376  | 2.35197                    | 0.09205                              | 21 |
| H     | 0.15723  | 2.35197                    | 0.09205                              | 22 |
| H     | 0.15731  | 2.35197                    | 0.09205                              | 23 |
| H     | 0.12854  | 2.35197                    | 0.09205                              | 24 |
| H     | 0.16015  | 2.35197                    | 0.09205                              | 25 |
| H     | 0.16709  | 2.35197                    | 0.09205                              | 26 |
| H     | 0.12962  | 2.35197                    | 0.09205                              | 27 |
| H     | 0.16886  | 2.35197                    | 0.09205                              | 28 |
| H     | 0.16145  | 2.35197                    | 0.09205                              | 29 |

# Bonds



| Atom Numbers |    | $r_{eq} / \text{\AA}$ | $k_r / \text{kJ mol}^{-1} \text{\AA}^{-2}$ |
|--------------|----|-----------------------|--------------------------------------------|
| 28           | 11 | 1.093                 | 1435.0745                                  |
| 16           | 6  | 1.093                 | 1435.0745                                  |
| 19           | 8  | 1.093                 | 1435.0745                                  |
| 27           | 11 | 1.093                 | 1435.0745                                  |
| 20           | 8  | 1.093                 | 1435.0745                                  |
| 8            | 6  | 1.508                 | 1282.1115                                  |
| 8            | 3  | 1.508                 | 1282.1115                                  |
| 11           | 29 | 1.093                 | 1435.0745                                  |
| 11           | 4  | 1.508                 | 1282.1115                                  |
| 6            | 15 | 1.093                 | 1435.0745                                  |
| 6            | 2  | 1.508                 | 1282.1115                                  |
| 23           | 9  | 1.093                 | 1435.0745                                  |
| 9            | 21 | 1.093                 | 1435.0745                                  |
| 9            | 3  | 1.508                 | 1282.1115                                  |
| 9            | 22 | 1.093                 | 1435.0745                                  |
| 1            | 4  | 1.418                 | 1519.6875                                  |
| 1            | 3  | 1.418                 | 1519.6875                                  |
| 4            | 2  | 1.508                 | 1282.1115                                  |
| 4            | 10 | 1.508                 | 1282.1115                                  |
| 3            | 7  | 1.508                 | 1282.1115                                  |
| 2            | 12 | 1.093                 | 1435.0745                                  |
| 2            | 5  | 1.508                 | 1282.1115                                  |
| 14           | 5  | 1.093                 | 1435.0745                                  |
| 25           | 10 | 1.093                 | 1435.0745                                  |
| 5            | 7  | 1.508                 | 1282.1115                                  |
| 5            | 13 | 1.093                 | 1435.0745                                  |
| 10           | 24 | 1.093                 | 1435.0745                                  |
| 10           | 26 | 1.093                 | 1435.0745                                  |
| 7            | 17 | 1.093                 | 1435.0745                                  |
| 7            | 18 | 1.093                 | 1435.0745                                  |

# Angles

| # Angles | Atom Numbers |    | $\theta_{eq} / \text{deg}$ | $k_{\theta} / \text{kJ mol}^{-1} \text{rad}^{-2}$ |
|----------|--------------|----|----------------------------|---------------------------------------------------|
| 3        | 1            | 4  | 106.926                    | 720.84                                            |
| 4        | 2            | 5  | 109.608                    | 512.48                                            |
| 4        | 2            | 6  | 109.608                    | 512.48                                            |
| 4        | 2            | 12 | 110.549                    | 383                                               |
| 5        | 2            | 6  | 109.608                    | 512.48                                            |
| 5        | 2            | 12 | 110.549                    | 383                                               |
| 6        | 2            | 12 | 110.549                    | 383                                               |
| 1        | 3            | 7  | 108.133                    | 597.39                                            |
| 1        | 3            | 8  | 108.133                    | 597.39                                            |
| 1        | 3            | 9  | 108.133                    | 597.39                                            |
| 7        | 3            | 8  | 109.608                    | 512.48                                            |
| 7        | 3            | 9  | 109.608                    | 512.48                                            |
| 8        | 3            | 9  | 109.608                    | 512.48                                            |
| 1        | 4            | 2  | 108.133                    | 597.39                                            |
| 1        | 4            | 10 | 108.133                    | 597.39                                            |
| 1        | 4            | 11 | 108.133                    | 597.39                                            |
| 2        | 4            | 10 | 109.608                    | 512.48                                            |
| 2        | 4            | 11 | 109.608                    | 512.48                                            |
| 10       | 4            | 11 | 109.608                    | 512.48                                            |
| 2        | 5            | 7  | 109.608                    | 512.48                                            |
| 2        | 5            | 13 | 110.549                    | 383                                               |
| 2        | 5            | 14 | 110.549                    | 383                                               |
| 7        | 5            | 13 | 110.549                    | 383                                               |
| 7        | 5            | 14 | 110.549                    | 383                                               |
| 13       | 5            | 14 | 108.836                    | 310.74                                            |
| 2        | 6            | 8  | 109.608                    | 512.48                                            |
| 2        | 6            | 15 | 110.549                    | 383                                               |
| 2        | 6            | 16 | 110.549                    | 383                                               |
| 8        | 6            | 15 | 110.549                    | 383                                               |
| 8        | 6            | 16 | 110.549                    | 383                                               |
| 15       | 6            | 16 | 108.836                    | 310.74                                            |
| 3        | 7            | 5  | 109.608                    | 512.48                                            |
| 3        | 7            | 17 | 110.549                    | 383                                               |
| 3        | 7            | 18 | 110.549                    | 383                                               |
| 5        | 7            | 17 | 110.549                    | 383                                               |
| 5        | 7            | 18 | 110.549                    | 383                                               |
| 17       | 7            | 18 | 108.836                    | 310.74                                            |
| 3        | 8            | 6  | 109.608                    | 512.48                                            |
| 3        | 8            | 19 | 110.549                    | 383                                               |
| 3        | 8            | 20 | 110.549                    | 383                                               |
| 6        | 8            | 19 | 110.549                    | 383                                               |
| 6        | 8            | 20 | 110.549                    | 383                                               |

|    |    |    |         |        |
|----|----|----|---------|--------|
| 19 | 8  | 20 | 108.836 | 310.74 |
| 3  | 9  | 21 | 110.549 | 383    |
| 3  | 9  | 22 | 110.549 | 383    |
| 3  | 9  | 23 | 110.549 | 383    |
| 21 | 9  | 22 | 108.836 | 310.74 |
| 21 | 9  | 23 | 108.836 | 310.74 |
| 22 | 9  | 23 | 108.836 | 310.74 |
| 4  | 10 | 24 | 110.549 | 383    |
| 4  | 10 | 25 | 110.549 | 383    |
| 4  | 10 | 26 | 110.549 | 383    |
| 24 | 10 | 25 | 108.836 | 310.74 |
| 24 | 10 | 26 | 108.836 | 310.74 |
| 25 | 10 | 26 | 108.836 | 310.74 |
| 4  | 11 | 27 | 110.549 | 383    |
| 4  | 11 | 28 | 110.549 | 383    |
| 4  | 11 | 29 | 110.549 | 383    |
| 27 | 11 | 28 | 108.836 | 310.74 |
| 27 | 11 | 29 | 108.836 | 310.74 |
| 28 | 11 | 29 | 108.836 | 310.74 |

# Dihedrals

|   | Atom Numbers |    |    | $\delta$ / deg | $k_{\phi}$ / kJ mol <sup>-1</sup> | m |
|---|--------------|----|----|----------------|-----------------------------------|---|
| 1 | 3            | 7  | 5  | 0              | -1.4393                           | 1 |
| 1 | 3            | 7  | 5  | 180            | 3.6777                            | 2 |
| 1 | 3            | 7  | 5  | 0              | 0.9958                            | 3 |
| 1 | 3            | 7  | 17 | 0              | -1.3682                           | 1 |
| 1 | 3            | 7  | 17 | 180            | 2.2426                            | 2 |
| 1 | 3            | 7  | 17 | 0              | 0.5858                            | 3 |
| 1 | 3            | 7  | 18 | 0              | -1.3682                           | 1 |
| 1 | 3            | 7  | 18 | 180            | 2.2426                            | 2 |
| 1 | 3            | 7  | 18 | 0              | 0.5858                            | 3 |
| 1 | 3            | 8  | 6  | 0              | -1.4393                           | 1 |
| 1 | 3            | 8  | 6  | 180            | 3.6777                            | 2 |
| 1 | 3            | 8  | 6  | 0              | 0.9958                            | 3 |
| 1 | 3            | 8  | 19 | 0              | -1.3682                           | 1 |
| 1 | 3            | 8  | 19 | 180            | 2.2426                            | 2 |
| 1 | 3            | 8  | 19 | 0              | 0.5858                            | 3 |
| 1 | 3            | 8  | 20 | 0              | -1.3682                           | 1 |
| 1 | 3            | 8  | 20 | 180            | 2.2426                            | 2 |
| 1 | 3            | 8  | 20 | 0              | 0.5858                            | 3 |
| 1 | 3            | 9  | 21 | 0              | -1.3682                           | 1 |
| 1 | 3            | 9  | 21 | 180            | 2.2426                            | 2 |
| 1 | 3            | 9  | 21 | 0              | 0.5858                            | 3 |
| 1 | 3            | 9  | 22 | 0              | -1.3682                           | 1 |
| 1 | 3            | 9  | 22 | 180            | 2.2426                            | 2 |
| 1 | 3            | 9  | 22 | 0              | 0.5858                            | 3 |
| 1 | 3            | 9  | 23 | 0              | -1.3682                           | 1 |
| 1 | 3            | 9  | 23 | 180            | 2.2426                            | 2 |
| 1 | 3            | 9  | 23 | 0              | 0.5858                            | 3 |
| 1 | 4            | 2  | 5  | 0              | -1.4393                           | 1 |
| 1 | 4            | 2  | 5  | 180            | 3.6777                            | 2 |
| 1 | 4            | 2  | 5  | 0              | 0.9958                            | 3 |
| 1 | 4            | 2  | 6  | 0              | -1.4393                           | 1 |
| 1 | 4            | 2  | 6  | 180            | 3.6777                            | 2 |
| 1 | 4            | 2  | 6  | 0              | 0.9958                            | 3 |
| 1 | 4            | 2  | 12 | 0              | -1.3682                           | 1 |
| 1 | 4            | 2  | 12 | 180            | 2.2426                            | 2 |
| 1 | 4            | 2  | 12 | 0              | 0.5858                            | 3 |
| 1 | 4            | 10 | 24 | 0              | -1.3682                           | 1 |
| 1 | 4            | 10 | 24 | 180            | 2.2426                            | 2 |
| 1 | 4            | 10 | 24 | 0              | 0.5858                            | 3 |
| 1 | 4            | 10 | 25 | 0              | -1.3682                           | 1 |
| 1 | 4            | 10 | 25 | 180            | 2.2426                            | 2 |
| 1 | 4            | 10 | 25 | 0              | 0.5858                            | 3 |
| 1 | 4            | 10 | 26 | 0              | -1.3682                           | 1 |
| 1 | 4            | 10 | 26 | 180            | 2.2426                            | 2 |
| 1 | 4            | 10 | 26 | 0              | 0.5858                            | 3 |
| 1 | 4            | 11 | 27 | 0              | -1.3682                           | 1 |
| 1 | 4            | 11 | 27 | 180            | 2.2426                            | 2 |
| 1 | 4            | 11 | 27 | 0              | 0.5858                            | 3 |
| 1 | 4            | 11 | 28 | 0              | -1.3682                           | 1 |
| 1 | 4            | 11 | 28 | 180            | 2.2426                            | 2 |
| 1 | 4            | 11 | 28 | 0              | 0.5858                            | 3 |
| 1 | 4            | 11 | 29 | 0              | -1.3682                           | 1 |
| 1 | 4            | 11 | 29 | 180            | 2.2426                            | 2 |
| 1 | 4            | 11 | 29 | 0              | 0.5858                            | 3 |

|   |   |    |    |     |         |   |
|---|---|----|----|-----|---------|---|
| 2 | 4 | 1  | 3  | 0   | -1.4267 | 1 |
| 2 | 4 | 1  | 3  | 180 | 1.5816  | 2 |
| 2 | 4 | 1  | 3  | 0   | 1.5816  | 3 |
| 2 | 4 | 10 | 24 | 0   | 1.3389  | 1 |
| 2 | 4 | 10 | 24 | 180 | -1.318  | 2 |
| 2 | 4 | 10 | 24 | 0   | 0.5523  | 3 |
| 2 | 4 | 10 | 25 | 0   | 1.3389  | 1 |
| 2 | 4 | 10 | 25 | 180 | -1.318  | 2 |
| 2 | 4 | 10 | 25 | 0   | 0.5523  | 3 |
| 2 | 4 | 10 | 26 | 0   | 1.3389  | 1 |
| 2 | 4 | 10 | 26 | 180 | -1.318  | 2 |
| 2 | 4 | 10 | 26 | 0   | 0.5523  | 3 |
| 2 | 4 | 11 | 27 | 0   | 1.3389  | 1 |
| 2 | 4 | 11 | 27 | 180 | -1.318  | 2 |
| 2 | 4 | 11 | 27 | 0   | 0.5523  | 3 |
| 2 | 4 | 11 | 28 | 0   | 1.3389  | 1 |
| 2 | 4 | 11 | 28 | 180 | -1.318  | 2 |
| 2 | 4 | 11 | 28 | 0   | 0.5523  | 3 |
| 2 | 4 | 11 | 29 | 0   | 1.3389  | 1 |
| 2 | 4 | 11 | 29 | 180 | -1.318  | 2 |
| 2 | 4 | 11 | 29 | 0   | 0.5523  | 3 |
| 2 | 5 | 7  | 3  | 0   | 0.2134  | 1 |
| 2 | 5 | 7  | 3  | 180 | 1.4267  | 2 |
| 2 | 5 | 7  | 3  | 0   | 0.6945  | 3 |
| 2 | 5 | 7  | 17 | 0   | 1.3389  | 1 |
| 2 | 5 | 7  | 17 | 180 | -1.318  | 2 |
| 2 | 5 | 7  | 17 | 0   | 0.5523  | 3 |
| 2 | 5 | 7  | 18 | 0   | 1.3389  | 1 |
| 2 | 5 | 7  | 18 | 180 | -1.318  | 2 |
| 2 | 5 | 7  | 18 | 0   | 0.5523  | 3 |
| 2 | 6 | 8  | 3  | 0   | 0.2134  | 1 |
| 2 | 6 | 8  | 3  | 180 | 1.4267  | 2 |
| 2 | 6 | 8  | 3  | 0   | 0.6945  | 3 |
| 2 | 6 | 8  | 19 | 0   | 1.3389  | 1 |
| 2 | 6 | 8  | 19 | 180 | -1.318  | 2 |
| 2 | 6 | 8  | 19 | 0   | 0.5523  | 3 |
| 2 | 6 | 8  | 20 | 0   | 1.3389  | 1 |
| 2 | 6 | 8  | 20 | 180 | -1.318  | 2 |
| 2 | 6 | 8  | 20 | 0   | 0.5523  | 3 |
| 3 | 1 | 4  | 10 | 0   | -1.4267 | 1 |
| 3 | 1 | 4  | 10 | 180 | 1.5816  | 2 |
| 3 | 1 | 4  | 10 | 0   | 1.5816  | 3 |
| 3 | 1 | 4  | 11 | 0   | -1.4267 | 1 |
| 3 | 1 | 4  | 11 | 180 | 1.5816  | 2 |
| 3 | 1 | 4  | 11 | 0   | 1.5816  | 3 |
| 3 | 7 | 5  | 13 | 0   | 1.3389  | 1 |
| 3 | 7 | 5  | 13 | 180 | -1.318  | 2 |
| 3 | 7 | 5  | 13 | 0   | 0.5523  | 3 |
| 3 | 7 | 5  | 14 | 0   | 1.3389  | 1 |
| 3 | 7 | 5  | 14 | 180 | -1.318  | 2 |
| 3 | 7 | 5  | 14 | 0   | 0.5523  | 3 |
| 3 | 8 | 6  | 15 | 0   | 1.3389  | 1 |
| 3 | 8 | 6  | 15 | 180 | -1.318  | 2 |
| 3 | 8 | 6  | 15 | 0   | 0.5523  | 3 |
| 3 | 8 | 6  | 16 | 0   | 1.3389  | 1 |
| 3 | 8 | 6  | 16 | 180 | -1.318  | 2 |
| 3 | 8 | 6  | 16 | 0   | 0.5523  | 3 |
| 4 | 1 | 3  | 7  | 0   | -1.4267 | 1 |
| 4 | 1 | 3  | 7  | 180 | 1.5816  | 2 |
| 4 | 1 | 3  | 7  | 0   | 1.5816  | 3 |
| 4 | 1 | 3  | 8  | 0   | -1.4267 | 1 |
| 4 | 1 | 3  | 8  | 180 | 1.5816  | 2 |
| 4 | 1 | 3  | 8  | 0   | 1.5816  | 3 |
| 4 | 1 | 3  | 9  | 0   | -1.4267 | 1 |
| 4 | 1 | 3  | 9  | 180 | 1.5816  | 2 |
| 4 | 1 | 3  | 9  | 0   | 1.5816  | 3 |
| 4 | 2 | 5  | 7  | 0   | 0.2134  | 1 |
| 4 | 2 | 5  | 7  | 180 | 1.4267  | 2 |
| 4 | 2 | 5  | 7  | 0   | 0.6945  | 3 |
| 4 | 2 | 5  | 13 | 0   | 1.3389  | 1 |
| 4 | 2 | 5  | 13 | 180 | -1.318  | 2 |
| 4 | 2 | 5  | 13 | 0   | 0.5523  | 3 |
| 4 | 2 | 5  | 14 | 0   | 1.3389  | 1 |
| 4 | 2 | 5  | 14 | 180 | -1.318  | 2 |
| 4 | 2 | 5  | 14 | 0   | 0.5523  | 3 |
| 4 | 2 | 6  | 8  | 0   | 0.2134  | 1 |

|   |   |   |    |     |        |   |
|---|---|---|----|-----|--------|---|
| 4 | 2 | 6 | 8  | 180 | 1.4267 | 2 |
| 4 | 2 | 6 | 8  | 0   | 0.6945 | 3 |
| 4 | 2 | 6 | 15 | 0   | 1.3389 | 1 |
| 4 | 2 | 6 | 15 | 180 | -1.318 | 2 |
| 4 | 2 | 6 | 15 | 0   | 0.5523 | 3 |
| 4 | 2 | 6 | 16 | 0   | 1.3389 | 1 |
| 4 | 2 | 6 | 16 | 180 | -1.318 | 2 |
| 4 | 2 | 6 | 16 | 0   | 0.5523 | 3 |
| 5 | 2 | 4 | 10 | 0   | 0.2134 | 1 |
| 5 | 2 | 4 | 10 | 180 | 1.4267 | 2 |
| 5 | 2 | 4 | 10 | 0   | 0.6945 | 3 |
| 5 | 2 | 4 | 11 | 0   | 0.2134 | 1 |
| 5 | 2 | 4 | 11 | 180 | 1.4267 | 2 |
| 5 | 2 | 4 | 11 | 0   | 0.6945 | 3 |
| 5 | 2 | 6 | 8  | 0   | 0.2134 | 1 |
| 5 | 2 | 6 | 8  | 180 | 1.4267 | 2 |
| 5 | 2 | 6 | 8  | 0   | 0.6945 | 3 |
| 5 | 2 | 6 | 15 | 0   | 1.3389 | 1 |
| 5 | 2 | 6 | 15 | 180 | -1.318 | 2 |
| 5 | 2 | 6 | 15 | 0   | 0.5523 | 3 |
| 5 | 2 | 6 | 16 | 0   | 1.3389 | 1 |
| 5 | 2 | 6 | 16 | 180 | -1.318 | 2 |
| 5 | 2 | 6 | 16 | 0   | 0.5523 | 3 |
| 5 | 7 | 3 | 8  | 0   | 0.2134 | 1 |
| 5 | 7 | 3 | 8  | 180 | 1.4267 | 2 |
| 5 | 7 | 3 | 8  | 0   | 0.6945 | 3 |
| 5 | 7 | 3 | 9  | 0   | 0.2134 | 1 |
| 5 | 7 | 3 | 9  | 180 | 1.4267 | 2 |
| 5 | 7 | 3 | 9  | 0   | 0.6945 | 3 |
| 6 | 2 | 4 | 10 | 0   | 0.2134 | 1 |
| 6 | 2 | 4 | 10 | 180 | 1.4267 | 2 |
| 6 | 2 | 4 | 10 | 0   | 0.6945 | 3 |
| 6 | 2 | 4 | 11 | 0   | 0.2134 | 1 |
| 6 | 2 | 4 | 11 | 180 | 1.4267 | 2 |
| 6 | 2 | 4 | 11 | 0   | 0.6945 | 3 |
| 6 | 2 | 5 | 7  | 0   | 0.2134 | 1 |
| 6 | 2 | 5 | 7  | 180 | 1.4267 | 2 |
| 6 | 2 | 5 | 7  | 0   | 0.6945 | 3 |
| 6 | 2 | 5 | 13 | 0   | 1.3389 | 1 |
| 6 | 2 | 5 | 13 | 180 | -1.318 | 2 |
| 6 | 2 | 5 | 13 | 0   | 0.5523 | 3 |
| 6 | 2 | 5 | 14 | 0   | 1.3389 | 1 |
| 6 | 2 | 5 | 14 | 180 | -1.318 | 2 |
| 6 | 2 | 5 | 14 | 0   | 0.5523 | 3 |
| 6 | 8 | 3 | 7  | 0   | 0.2134 | 1 |
| 6 | 8 | 3 | 7  | 180 | 1.4267 | 2 |
| 6 | 8 | 3 | 7  | 0   | 0.6945 | 3 |
| 6 | 8 | 3 | 9  | 0   | 0.2134 | 1 |
| 6 | 8 | 3 | 9  | 180 | 1.4267 | 2 |
| 6 | 8 | 3 | 9  | 0   | 0.6945 | 3 |
| 7 | 3 | 8 | 19 | 0   | 1.3389 | 1 |
| 7 | 3 | 8 | 19 | 180 | -1.318 | 2 |
| 7 | 3 | 8 | 19 | 0   | 0.5523 | 3 |
| 7 | 3 | 8 | 20 | 0   | 1.3389 | 1 |
| 7 | 3 | 8 | 20 | 180 | -1.318 | 2 |
| 7 | 3 | 8 | 20 | 0   | 0.5523 | 3 |
| 7 | 3 | 9 | 21 | 0   | 1.3389 | 1 |
| 7 | 3 | 9 | 21 | 180 | -1.318 | 2 |
| 7 | 3 | 9 | 21 | 0   | 0.5523 | 3 |
| 7 | 3 | 9 | 22 | 0   | 1.3389 | 1 |
| 7 | 3 | 9 | 22 | 180 | -1.318 | 2 |
| 7 | 3 | 9 | 22 | 0   | 0.5523 | 3 |
| 7 | 3 | 9 | 23 | 0   | 1.3389 | 1 |
| 7 | 3 | 9 | 23 | 180 | -1.318 | 2 |
| 7 | 3 | 9 | 23 | 0   | 0.5523 | 3 |
| 7 | 5 | 2 | 12 | 0   | 1.3389 | 1 |
| 7 | 5 | 2 | 12 | 180 | -1.318 | 2 |
| 7 | 5 | 2 | 12 | 0   | 0.5523 | 3 |
| 8 | 3 | 7 | 17 | 0   | 1.3389 | 1 |
| 8 | 3 | 7 | 17 | 180 | -1.318 | 2 |
| 8 | 3 | 7 | 17 | 0   | 0.5523 | 3 |
| 8 | 3 | 7 | 18 | 0   | 1.3389 | 1 |
| 8 | 3 | 7 | 18 | 180 | -1.318 | 2 |
| 8 | 3 | 7 | 18 | 0   | 0.5523 | 3 |
| 8 | 3 | 9 | 21 | 0   | 1.3389 | 1 |
| 8 | 3 | 9 | 21 | 180 | -1.318 | 2 |

|    |   |    |    |     |         |   |
|----|---|----|----|-----|---------|---|
| 8  | 3 | 9  | 21 | 0   | 0.5523  | 3 |
| 8  | 3 | 9  | 22 | 0   | 1.3389  | 1 |
| 8  | 3 | 9  | 22 | 180 | -1.318  | 2 |
| 8  | 3 | 9  | 22 | 0   | 0.5523  | 3 |
| 8  | 3 | 9  | 23 | 0   | 1.3389  | 1 |
| 8  | 3 | 9  | 23 | 180 | -1.318  | 2 |
| 8  | 3 | 9  | 23 | 0   | 0.5523  | 3 |
| 8  | 6 | 2  | 12 | 0   | 1.3389  | 1 |
| 8  | 6 | 2  | 12 | 180 | -1.318  | 2 |
| 8  | 6 | 2  | 12 | 0   | 0.5523  | 3 |
| 9  | 3 | 7  | 17 | 0   | 1.3389  | 1 |
| 9  | 3 | 7  | 17 | 180 | -1.318  | 2 |
| 9  | 3 | 7  | 17 | 0   | 0.5523  | 3 |
| 9  | 3 | 7  | 18 | 0   | 1.3389  | 1 |
| 9  | 3 | 7  | 18 | 180 | -1.318  | 2 |
| 9  | 3 | 7  | 18 | 0   | 0.5523  | 3 |
| 9  | 3 | 8  | 19 | 0   | 1.3389  | 1 |
| 9  | 3 | 8  | 19 | 180 | -1.318  | 2 |
| 9  | 3 | 8  | 19 | 0   | 0.5523  | 3 |
| 9  | 3 | 8  | 20 | 0   | 1.3389  | 1 |
| 9  | 3 | 8  | 20 | 180 | -1.318  | 2 |
| 9  | 3 | 8  | 20 | 0   | 0.5523  | 3 |
| 10 | 4 | 2  | 12 | 0   | 1.3389  | 1 |
| 10 | 4 | 2  | 12 | 180 | -1.318  | 2 |
| 10 | 4 | 2  | 12 | 0   | 0.5523  | 3 |
| 10 | 4 | 11 | 27 | 0   | 1.3389  | 1 |
| 10 | 4 | 11 | 27 | 180 | -1.318  | 2 |
| 10 | 4 | 11 | 27 | 0   | 0.5523  | 3 |
| 10 | 4 | 11 | 28 | 0   | 1.3389  | 1 |
| 10 | 4 | 11 | 28 | 180 | -1.318  | 2 |
| 10 | 4 | 11 | 28 | 0   | 0.5523  | 3 |
| 10 | 4 | 11 | 29 | 0   | 1.3389  | 1 |
| 10 | 4 | 11 | 29 | 180 | -1.318  | 2 |
| 10 | 4 | 11 | 29 | 0   | 0.5523  | 3 |
| 11 | 4 | 2  | 12 | 0   | 1.3389  | 1 |
| 11 | 4 | 2  | 12 | 180 | -1.318  | 2 |
| 11 | 4 | 2  | 12 | 0   | 0.5523  | 3 |
| 11 | 4 | 10 | 24 | 0   | 1.3389  | 1 |
| 11 | 4 | 10 | 24 | 180 | -1.318  | 2 |
| 11 | 4 | 10 | 24 | 0   | 0.5523  | 3 |
| 11 | 4 | 10 | 25 | 0   | 1.3389  | 1 |
| 11 | 4 | 10 | 25 | 180 | -1.318  | 2 |
| 11 | 4 | 10 | 25 | 0   | 0.5523  | 3 |
| 11 | 4 | 10 | 26 | 0   | 1.3389  | 1 |
| 11 | 4 | 10 | 26 | 180 | -1.318  | 2 |
| 11 | 4 | 10 | 26 | 0   | 0.5523  | 3 |
| 12 | 2 | 5  | 13 | 0   | 0.5941  | 1 |
| 12 | 2 | 5  | 13 | 180 | -2.8995 | 2 |
| 12 | 2 | 5  | 13 | 0   | 0.6569  | 3 |
| 12 | 2 | 5  | 14 | 0   | 0.5941  | 1 |
| 12 | 2 | 5  | 14 | 180 | -2.8995 | 2 |
| 12 | 2 | 5  | 14 | 0   | 0.6569  | 3 |
| 12 | 2 | 6  | 15 | 0   | 0.5941  | 1 |
| 12 | 2 | 6  | 15 | 180 | -2.8995 | 2 |
| 12 | 2 | 6  | 15 | 0   | 0.6569  | 3 |
| 12 | 2 | 6  | 16 | 0   | 0.5941  | 1 |
| 12 | 2 | 6  | 16 | 180 | -2.8995 | 2 |
| 12 | 2 | 6  | 16 | 0   | 0.6569  | 3 |
| 13 | 5 | 7  | 17 | 0   | 0.5941  | 1 |
| 13 | 5 | 7  | 17 | 180 | -2.8995 | 2 |
| 13 | 5 | 7  | 17 | 0   | 0.6569  | 3 |
| 13 | 5 | 7  | 18 | 0   | 0.5941  | 1 |
| 13 | 5 | 7  | 18 | 180 | -2.8995 | 2 |
| 13 | 5 | 7  | 18 | 0   | 0.6569  | 3 |
| 14 | 5 | 7  | 17 | 0   | 0.5941  | 1 |
| 14 | 5 | 7  | 17 | 180 | -2.8995 | 2 |
| 14 | 5 | 7  | 17 | 0   | 0.6569  | 3 |
| 14 | 5 | 7  | 18 | 0   | 0.5941  | 1 |
| 14 | 5 | 7  | 18 | 180 | -2.8995 | 2 |
| 14 | 5 | 7  | 18 | 0   | 0.6569  | 3 |
| 15 | 6 | 8  | 19 | 0   | 0.5941  | 1 |
| 15 | 6 | 8  | 19 | 180 | -2.8995 | 2 |
| 15 | 6 | 8  | 19 | 0   | 0.6569  | 3 |
| 15 | 6 | 8  | 20 | 0   | 0.5941  | 1 |
| 15 | 6 | 8  | 20 | 180 | -2.8995 | 2 |
| 15 | 6 | 8  | 20 | 0   | 0.6569  | 3 |

|    |   |   |    |     |         |   |
|----|---|---|----|-----|---------|---|
| 16 | 6 | 8 | 19 | 0   | 0.5941  | 1 |
| 16 | 6 | 8 | 19 | 180 | -2.8995 | 2 |
| 16 | 6 | 8 | 19 | 0   | 0.6569  | 3 |
| 16 | 6 | 8 | 20 | 0   | 0.5941  | 1 |
| 16 | 6 | 8 | 20 | 180 | -2.8995 | 2 |
| 16 | 6 | 8 | 20 | 0   | 0.6569  | 3 |

# Improper

|    | Atom Numbers |   |    | $\phi_0$ / deg | $k_\phi$ / kJ mol <sup>-1</sup> |
|----|--------------|---|----|----------------|---------------------------------|
| 4  | 2            | 1 | 11 | 0              | 0                               |
| 4  | 11           | 1 | 10 | 0              | 0                               |
| 2  | 6            | 4 | 5  | 0              | 0                               |
| 2  | 6            | 4 | 12 | 0              | 0                               |
| 3  | 9            | 1 | 8  | 0              | 0                               |
| 3  | 8            | 1 | 7  | 0              | 0                               |
| 5  | 7            | 2 | 14 | 0              | 0                               |
| 5  | 14           | 2 | 13 | 0              | 0                               |
| 6  | 8            | 2 | 16 | 0              | 0                               |
| 6  | 16           | 2 | 15 | 0              | 0                               |
| 7  | 5            | 3 | 17 | 0              | 0                               |
| 7  | 5            | 3 | 18 | 0              | 0                               |
| 8  | 6            | 3 | 19 | 0              | 0                               |
| 8  | 19           | 3 | 20 | 0              | 0                               |
| 9  | 23           | 3 | 21 | 0              | 0                               |
| 9  | 23           | 3 | 22 | 0              | 0                               |
| 10 | 25           | 4 | 24 | 0              | 0                               |
| 10 | 25           | 4 | 26 | 0              | 0                               |
| 11 | 28           | 4 | 27 | 0              | 0                               |
| 11 | 28           | 4 | 29 | 0              | 0                               |

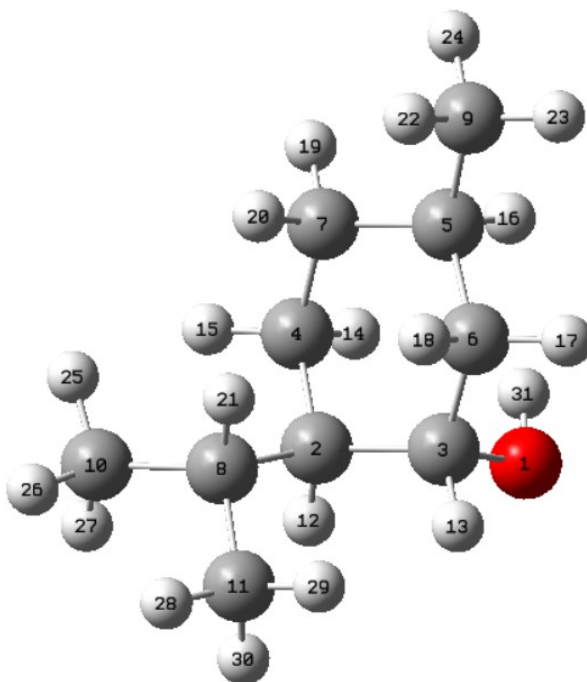

## MEN

| label | $q$      | $\sigma_{ii}$ / Å | $\epsilon_{ii}$ / kJ mol <sup>-1</sup> | #  |
|-------|----------|-------------------|----------------------------------------|----|
| O2    | -0.76638 | 3.12000           | 0.70788                                | 1  |
| C     | -0.22659 | 3.50000           | 0.27610                                | 2  |
| C2    | 0.51479  | 3.50000           | 0.27610                                | 3  |
| C     | -0.04496 | 3.50000           | 0.27610                                | 4  |
| C     | 0.62366  | 3.50000           | 0.27610                                | 5  |
| C     | -0.57888 | 3.50000           | 0.27610                                | 6  |
| C     | -0.25652 | 3.50000           | 0.27610                                | 7  |
| C     | 0.56109  | 3.50000           | 0.27610                                | 8  |
| C     | -0.56219 | 3.50000           | 0.27610                                | 9  |
| C     | -0.55873 | 3.50000           | 0.27610                                | 10 |
| C     | -0.58099 | 3.50000           | 0.27610                                | 11 |
| H     | 0.04793  | 2.50000           | 0.12552                                | 12 |
| H     | 0.05556  | 2.50000           | 0.12552                                | 13 |
| H     | 0.00327  | 2.50000           | 0.12552                                | 14 |

|    |          |         |         |    |
|----|----------|---------|---------|----|
| H  | 0.05121  | 2.50000 | 0.12552 | 15 |
| H  | -0.09023 | 2.50000 | 0.12552 | 16 |
| H  | 0.12304  | 2.50000 | 0.12552 | 17 |
| H  | 0.10552  | 2.50000 | 0.12552 | 18 |
| H  | 0.04575  | 2.50000 | 0.12552 | 19 |
| H  | 0.05679  | 2.50000 | 0.12552 | 20 |
| H  | -0.05547 | 2.50000 | 0.12552 | 21 |
| H  | 0.12361  | 2.50000 | 0.12552 | 22 |
| H  | 0.12775  | 2.50000 | 0.12552 | 23 |
| H  | 0.10872  | 2.50000 | 0.12552 | 24 |
| H  | 0.12442  | 2.50000 | 0.12552 | 25 |
| H  | 0.11805  | 2.50000 | 0.12552 | 26 |
| H  | 0.12875  | 2.50000 | 0.12552 | 27 |
| H  | 0.13773  | 2.50000 | 0.12552 | 28 |
| H  | 0.09569  | 2.50000 | 0.12552 | 29 |
| H  | 0.13184  | 2.50000 | 0.12552 | 30 |
| H2 | 0.43578  | 0.40001 | 0.19246 | 31 |

#### # Bonds

| Atom Numbers | $r_{eq} / \text{\AA}$ | $k_r / \text{kJ mol}^{-1} \text{\AA}^{-2}$ |
|--------------|-----------------------|--------------------------------------------|
| 1 3          | 1.418                 | 1519.6875                                  |
| 1 31         | 0.972                 | 2346.8265                                  |
| 2 3          | 1.508                 | 1282.1115                                  |
| 2 4          | 1.508                 | 1282.1115                                  |
| 2 8          | 1.508                 | 1282.1115                                  |
| 2 12         | 1.093                 | 1435.0745                                  |
| 3 6          | 1.508                 | 1282.1115                                  |
| 3 13         | 1.093                 | 1435.0745                                  |
| 4 7          | 1.508                 | 1282.1115                                  |
| 4 14         | 1.093                 | 1435.0745                                  |
| 4 15         | 1.093                 | 1435.0745                                  |
| 5 6          | 1.508                 | 1282.1115                                  |
| 5 7          | 1.508                 | 1282.1115                                  |
| 5 9          | 1.508                 | 1282.1115                                  |
| 5 16         | 1.093                 | 1435.0745                                  |
| 6 17         | 1.093                 | 1435.0745                                  |
| 6 18         | 1.093                 | 1435.0745                                  |
| 7 19         | 1.093                 | 1435.0745                                  |
| 7 20         | 1.093                 | 1435.0745                                  |
| 8 10         | 1.508                 | 1282.1115                                  |
| 8 11         | 1.508                 | 1282.1115                                  |
| 8 21         | 1.093                 | 1435.0745                                  |
| 9 22         | 1.093                 | 1435.0745                                  |
| 9 23         | 1.093                 | 1435.0745                                  |
| 9 24         | 1.093                 | 1435.0745                                  |
| 10 25        | 1.093                 | 1435.0745                                  |
| 10 26        | 1.093                 | 1435.0745                                  |
| 10 27        | 1.093                 | 1435.0745                                  |
| 11 28        | 1.093                 | 1435.0745                                  |
| 11 29        | 1.093                 | 1435.0745                                  |
| 11 30        | 1.093                 | 1435.0745                                  |

#### # Angles

| Atom Numbers | $\theta_{eq} / \text{deg}$ | $k_{\theta} / \text{kJ mol}^{-1} \text{rad}^{-2}$ |
|--------------|----------------------------|---------------------------------------------------|
| 3 1 31       | 106.503                    | 477.55                                            |
| 3 2 4        | 109.608                    | 512.48                                            |
| 3 2 8        | 109.608                    | 512.48                                            |
| 3 2 12       | 110.549                    | 383                                               |
| 4 2 8        | 109.608                    | 512.48                                            |
| 4 2 12       | 110.549                    | 383                                               |
| 8 2 12       | 110.549                    | 383                                               |
| 1 3 2        | 108.133                    | 597.39                                            |
| 1 3 6        | 108.133                    | 597.39                                            |
| 1 3 13       | 108.577                    | 470.32                                            |
| 2 3 6        | 109.608                    | 512.48                                            |
| 2 3 13       | 110.549                    | 383                                               |
| 6 3 13       | 110.549                    | 383                                               |
| 2 4 7        | 109.608                    | 512.48                                            |
| 2 4 14       | 110.549                    | 383                                               |
| 2 4 15       | 110.549                    | 383                                               |
| 7 4 14       | 110.549                    | 383                                               |
| 7 4 15       | 110.549                    | 383                                               |
| 14 4 15      | 108.836                    | 310.74                                            |
| 6 5 7        | 109.608                    | 512.48                                            |
| 6 5 9        | 109.608                    | 512.48                                            |
| 6 5 16       | 110.549                    | 383                                               |

|    |    |    |         |        |
|----|----|----|---------|--------|
| 7  | 5  | 9  | 109.608 | 512.48 |
| 7  | 5  | 16 | 110.549 | 383    |
| 9  | 5  | 16 | 110.549 | 383    |
| 3  | 6  | 5  | 109.608 | 512.48 |
| 3  | 6  | 17 | 110.549 | 383    |
| 3  | 6  | 18 | 110.549 | 383    |
| 5  | 6  | 17 | 110.549 | 383    |
| 5  | 6  | 18 | 110.549 | 383    |
| 17 | 6  | 18 | 108.836 | 310.74 |
| 4  | 7  | 5  | 109.608 | 512.48 |
| 4  | 7  | 19 | 110.549 | 383    |
| 4  | 7  | 20 | 110.549 | 383    |
| 5  | 7  | 19 | 110.549 | 383    |
| 5  | 7  | 20 | 110.549 | 383    |
| 19 | 7  | 20 | 108.836 | 310.74 |
| 2  | 8  | 10 | 109.608 | 512.48 |
| 2  | 8  | 11 | 109.608 | 512.48 |
| 2  | 8  | 21 | 110.549 | 383    |
| 10 | 8  | 11 | 109.608 | 512.48 |
| 10 | 8  | 21 | 110.549 | 383    |
| 11 | 8  | 21 | 110.549 | 383    |
| 5  | 9  | 22 | 110.549 | 383    |
| 5  | 9  | 23 | 110.549 | 383    |
| 5  | 9  | 24 | 110.549 | 383    |
| 22 | 9  | 23 | 108.836 | 310.74 |
| 22 | 9  | 24 | 108.836 | 310.74 |
| 23 | 9  | 24 | 108.836 | 310.74 |
| 8  | 10 | 25 | 110.549 | 383    |
| 8  | 10 | 26 | 110.549 | 383    |
| 8  | 10 | 27 | 110.549 | 383    |
| 25 | 10 | 26 | 108.836 | 310.74 |
| 25 | 10 | 27 | 108.836 | 310.74 |
| 26 | 10 | 27 | 108.836 | 310.74 |
| 8  | 11 | 28 | 110.549 | 383    |
| 8  | 11 | 29 | 110.549 | 383    |
| 8  | 11 | 30 | 110.549 | 383    |
| 28 | 11 | 29 | 108.836 | 310.74 |
| 28 | 11 | 30 | 108.836 | 310.74 |
| 29 | 11 | 30 | 108.836 | 310.74 |

# Dihedrals

|   | Atom Numbers |   |    | $\delta$ / deg | $k_{\phi}$ / kJ mol <sup>-1</sup> | m |
|---|--------------|---|----|----------------|-----------------------------------|---|
| 1 | 3            | 2 | 4  | 0              | -1.4393                           | 1 |
| 1 | 3            | 2 | 4  | 180            | 3.6777                            | 2 |
| 1 | 3            | 2 | 4  | 0              | 0.9958                            | 3 |
| 1 | 3            | 2 | 8  | 0              | -1.4393                           | 1 |
| 1 | 3            | 2 | 8  | 180            | 3.6777                            | 2 |
| 1 | 3            | 2 | 8  | 0              | 0.9958                            | 3 |
| 1 | 3            | 2 | 12 | 0              | -1.3682                           | 1 |
| 1 | 3            | 2 | 12 | 180            | 2.2426                            | 2 |
| 1 | 3            | 2 | 12 | 0              | 0.5858                            | 3 |
| 1 | 3            | 6 | 5  | 0              | -1.4393                           | 1 |
| 1 | 3            | 6 | 5  | 180            | 3.6777                            | 2 |
| 1 | 3            | 6 | 5  | 0              | 0.9958                            | 3 |
| 1 | 3            | 6 | 17 | 0              | -1.3682                           | 1 |
| 1 | 3            | 6 | 17 | 180            | 2.2426                            | 2 |
| 1 | 3            | 6 | 17 | 0              | 0.5858                            | 3 |
| 1 | 3            | 6 | 18 | 0              | -1.3682                           | 1 |
| 1 | 3            | 6 | 18 | 180            | 2.2426                            | 2 |
| 1 | 3            | 6 | 18 | 0              | 0.5858                            | 3 |
| 2 | 3            | 1 | 31 | 180            | 0.5648                            | 2 |
| 2 | 3            | 1 | 31 | 0              | 0.4937                            | 3 |
| 2 | 3            | 6 | 5  | 0              | 0.2134                            | 1 |
| 2 | 3            | 6 | 5  | 180            | 1.4267                            | 2 |
| 2 | 3            | 6 | 5  | 0              | 0.6945                            | 3 |
| 2 | 3            | 6 | 17 | 0              | 1.3389                            | 1 |
| 2 | 3            | 6 | 17 | 180            | -1.318                            | 2 |
| 2 | 3            | 6 | 17 | 0              | 0.5523                            | 3 |
| 2 | 3            | 6 | 18 | 0              | 1.3389                            | 1 |
| 2 | 3            | 6 | 18 | 180            | -1.318                            | 2 |
| 2 | 3            | 6 | 18 | 0              | 0.5523                            | 3 |
| 2 | 4            | 7 | 5  | 0              | 0.2134                            | 1 |
| 2 | 4            | 7 | 5  | 180            | 1.4267                            | 2 |
| 2 | 4            | 7 | 5  | 0              | 0.6945                            | 3 |
| 2 | 4            | 7 | 19 | 0              | 1.3389                            | 1 |
| 2 | 4            | 7 | 19 | 180            | -1.318                            | 2 |



|   |   |    |    |     |        |   |
|---|---|----|----|-----|--------|---|
| 2 | 4 | 7  | 19 | 0   | 0.5523 | 3 |
| 2 | 4 | 7  | 20 | 0   | 1.3389 | 1 |
| 2 | 4 | 7  | 20 | 180 | -1.318 | 2 |
| 2 | 4 | 7  | 20 | 0   | 0.5523 | 3 |
| 2 | 8 | 10 | 25 | 0   | 1.3389 | 1 |
| 2 | 8 | 10 | 25 | 180 | -1.318 | 2 |
| 2 | 8 | 10 | 25 | 0   | 0.5523 | 3 |
| 2 | 8 | 10 | 26 | 0   | 1.3389 | 1 |
| 2 | 8 | 10 | 26 | 180 | -1.318 | 2 |
| 2 | 8 | 10 | 26 | 0   | 0.5523 | 3 |
| 2 | 8 | 10 | 27 | 0   | 1.3389 | 1 |
| 2 | 8 | 10 | 27 | 180 | -1.318 | 2 |
| 2 | 8 | 10 | 27 | 0   | 0.5523 | 3 |
| 2 | 8 | 11 | 28 | 0   | 1.3389 | 1 |
| 2 | 8 | 11 | 28 | 180 | -1.318 | 2 |
| 2 | 8 | 11 | 28 | 0   | 0.5523 | 3 |
| 2 | 8 | 11 | 29 | 0   | 1.3389 | 1 |
| 2 | 8 | 11 | 29 | 180 | -1.318 | 2 |
| 2 | 8 | 11 | 29 | 0   | 0.5523 | 3 |
| 2 | 8 | 11 | 30 | 0   | 1.3389 | 1 |
| 2 | 8 | 11 | 30 | 180 | -1.318 | 2 |
| 2 | 8 | 11 | 30 | 0   | 0.5523 | 3 |
| 3 | 2 | 4  | 7  | 0   | 0.2134 | 1 |
| 3 | 2 | 4  | 7  | 180 | 1.4267 | 2 |
| 3 | 2 | 4  | 7  | 0   | 0.6945 | 3 |
| 3 | 2 | 4  | 14 | 0   | 1.3389 | 1 |
| 3 | 2 | 4  | 14 | 180 | -1.318 | 2 |
| 3 | 2 | 4  | 14 | 0   | 0.5523 | 3 |
| 3 | 2 | 4  | 15 | 0   | 1.3389 | 1 |
| 3 | 2 | 4  | 15 | 180 | -1.318 | 2 |
| 3 | 2 | 4  | 15 | 0   | 0.5523 | 3 |
| 3 | 2 | 8  | 10 | 0   | 0.2134 | 1 |
| 3 | 2 | 8  | 10 | 180 | 1.4267 | 2 |
| 3 | 2 | 8  | 10 | 0   | 0.6945 | 3 |
| 3 | 2 | 8  | 11 | 0   | 0.2134 | 1 |
| 3 | 2 | 8  | 11 | 180 | 1.4267 | 2 |
| 3 | 2 | 8  | 11 | 0   | 0.6945 | 3 |
| 3 | 2 | 8  | 21 | 0   | 1.3389 | 1 |
| 3 | 2 | 8  | 21 | 180 | -1.318 | 2 |
| 3 | 2 | 8  | 21 | 0   | 0.5523 | 3 |
| 3 | 6 | 5  | 7  | 0   | 0.2134 | 1 |
| 3 | 6 | 5  | 7  | 180 | 1.4267 | 2 |
| 3 | 6 | 5  | 7  | 0   | 0.6945 | 3 |
| 3 | 6 | 5  | 9  | 0   | 0.2134 | 1 |
| 3 | 6 | 5  | 9  | 180 | 1.4267 | 2 |
| 3 | 6 | 5  | 9  | 0   | 0.6945 | 3 |
| 3 | 6 | 5  | 16 | 0   | 1.3389 | 1 |
| 3 | 6 | 5  | 16 | 180 | -1.318 | 2 |
| 3 | 6 | 5  | 16 | 0   | 0.5523 | 3 |
| 4 | 2 | 3  | 6  | 0   | 0.2134 | 1 |
| 4 | 2 | 3  | 6  | 180 | 1.4267 | 2 |
| 4 | 2 | 3  | 6  | 0   | 0.6945 | 3 |
| 4 | 2 | 3  | 13 | 0   | 1.3389 | 1 |
| 4 | 2 | 3  | 13 | 180 | -1.318 | 2 |
| 4 | 2 | 3  | 13 | 0   | 0.5523 | 3 |
| 4 | 2 | 8  | 10 | 0   | 0.2134 | 1 |
| 4 | 2 | 8  | 10 | 180 | 1.4267 | 2 |
| 4 | 2 | 8  | 10 | 0   | 0.6945 | 3 |
| 4 | 2 | 8  | 11 | 0   | 0.2134 | 1 |
| 4 | 2 | 8  | 11 | 180 | 1.4267 | 2 |
| 4 | 2 | 8  | 11 | 0   | 0.6945 | 3 |
| 4 | 2 | 8  | 21 | 0   | 1.3389 | 1 |
| 4 | 2 | 8  | 21 | 180 | -1.318 | 2 |
| 4 | 2 | 8  | 21 | 0   | 0.5523 | 3 |
| 4 | 7 | 5  | 6  | 0   | 0.2134 | 1 |
| 4 | 7 | 5  | 6  | 180 | 1.4267 | 2 |
| 4 | 7 | 5  | 6  | 0   | 0.6945 | 3 |
| 4 | 7 | 5  | 9  | 0   | 0.2134 | 1 |
| 4 | 7 | 5  | 9  | 180 | 1.4267 | 2 |
| 4 | 7 | 5  | 9  | 0   | 0.6945 | 3 |
| 4 | 7 | 5  | 16 | 0   | 1.3389 | 1 |
| 4 | 7 | 5  | 16 | 180 | -1.318 | 2 |
| 4 | 7 | 5  | 16 | 0   | 0.5523 | 3 |
| 5 | 6 | 3  | 13 | 0   | 1.3389 | 1 |
| 5 | 6 | 3  | 13 | 180 | -1.318 | 2 |
| 5 | 6 | 3  | 13 | 0   | 0.5523 | 3 |

|    |   |    |    |     |        |   |
|----|---|----|----|-----|--------|---|
| 5  | 7 | 4  | 14 | 0   | 1.3389 | 1 |
| 5  | 7 | 4  | 14 | 180 | -1.318 | 2 |
| 5  | 7 | 4  | 14 | 0   | 0.5523 | 3 |
| 5  | 7 | 4  | 15 | 0   | 1.3389 | 1 |
| 5  | 7 | 4  | 15 | 180 | -1.318 | 2 |
| 5  | 7 | 4  | 15 | 0   | 0.5523 | 3 |
| 6  | 3 | 1  | 31 | 180 | 0.5648 | 2 |
| 6  | 3 | 1  | 31 | 0   | 0.4937 | 3 |
| 6  | 3 | 2  | 8  | 0   | 0.2134 | 1 |
| 6  | 3 | 2  | 8  | 180 | 1.4267 | 2 |
| 6  | 3 | 2  | 8  | 0   | 0.6945 | 3 |
| 6  | 3 | 2  | 12 | 0   | 1.3389 | 1 |
| 6  | 3 | 2  | 12 | 180 | -1.318 | 2 |
| 6  | 3 | 2  | 12 | 0   | 0.5523 | 3 |
| 6  | 5 | 7  | 19 | 0   | 1.3389 | 1 |
| 6  | 5 | 7  | 19 | 180 | -1.318 | 2 |
| 6  | 5 | 7  | 19 | 0   | 0.5523 | 3 |
| 6  | 5 | 7  | 20 | 0   | 1.3389 | 1 |
| 6  | 5 | 7  | 20 | 180 | -1.318 | 2 |
| 6  | 5 | 7  | 20 | 0   | 0.5523 | 3 |
| 6  | 5 | 9  | 22 | 0   | 1.3389 | 1 |
| 6  | 5 | 9  | 22 | 180 | -1.318 | 2 |
| 6  | 5 | 9  | 22 | 0   | 0.5523 | 3 |
| 6  | 5 | 9  | 23 | 0   | 1.3389 | 1 |
| 6  | 5 | 9  | 23 | 180 | -1.318 | 2 |
| 6  | 5 | 9  | 23 | 0   | 0.5523 | 3 |
| 6  | 5 | 9  | 24 | 0   | 1.3389 | 1 |
| 6  | 5 | 9  | 24 | 180 | -1.318 | 2 |
| 6  | 5 | 9  | 24 | 0   | 0.5523 | 3 |
| 7  | 4 | 2  | 8  | 0   | 0.2134 | 1 |
| 7  | 4 | 2  | 8  | 180 | 1.4267 | 2 |
| 7  | 4 | 2  | 8  | 0   | 0.6945 | 3 |
| 7  | 4 | 2  | 12 | 0   | 1.3389 | 1 |
| 7  | 4 | 2  | 12 | 180 | -1.318 | 2 |
| 7  | 4 | 2  | 12 | 0   | 0.5523 | 3 |
| 7  | 5 | 6  | 17 | 0   | 1.3389 | 1 |
| 7  | 5 | 6  | 17 | 180 | -1.318 | 2 |
| 7  | 5 | 6  | 17 | 0   | 0.5523 | 3 |
| 7  | 5 | 6  | 18 | 0   | 1.3389 | 1 |
| 7  | 5 | 6  | 18 | 180 | -1.318 | 2 |
| 7  | 5 | 6  | 18 | 0   | 0.5523 | 3 |
| 7  | 5 | 9  | 22 | 0   | 1.3389 | 1 |
| 7  | 5 | 9  | 22 | 180 | -1.318 | 2 |
| 7  | 5 | 9  | 22 | 0   | 0.5523 | 3 |
| 7  | 5 | 9  | 23 | 0   | 1.3389 | 1 |
| 7  | 5 | 9  | 23 | 180 | -1.318 | 2 |
| 7  | 5 | 9  | 23 | 0   | 0.5523 | 3 |
| 7  | 5 | 9  | 24 | 0   | 1.3389 | 1 |
| 7  | 5 | 9  | 24 | 180 | -1.318 | 2 |
| 7  | 5 | 9  | 24 | 0   | 0.5523 | 3 |
| 8  | 2 | 3  | 13 | 0   | 1.3389 | 1 |
| 8  | 2 | 3  | 13 | 180 | -1.318 | 2 |
| 8  | 2 | 3  | 13 | 0   | 0.5523 | 3 |
| 8  | 2 | 4  | 14 | 0   | 1.3389 | 1 |
| 8  | 2 | 4  | 14 | 180 | -1.318 | 2 |
| 8  | 2 | 4  | 14 | 0   | 0.5523 | 3 |
| 8  | 2 | 4  | 15 | 0   | 1.3389 | 1 |
| 8  | 2 | 4  | 15 | 180 | -1.318 | 2 |
| 8  | 2 | 4  | 15 | 0   | 0.5523 | 3 |
| 9  | 5 | 6  | 17 | 0   | 1.3389 | 1 |
| 9  | 5 | 6  | 17 | 180 | -1.318 | 2 |
| 9  | 5 | 6  | 17 | 0   | 0.5523 | 3 |
| 9  | 5 | 6  | 18 | 0   | 1.3389 | 1 |
| 9  | 5 | 6  | 18 | 180 | -1.318 | 2 |
| 9  | 5 | 6  | 18 | 0   | 0.5523 | 3 |
| 9  | 5 | 7  | 19 | 0   | 1.3389 | 1 |
| 9  | 5 | 7  | 19 | 180 | -1.318 | 2 |
| 9  | 5 | 7  | 19 | 0   | 0.5523 | 3 |
| 9  | 5 | 7  | 20 | 0   | 1.3389 | 1 |
| 9  | 5 | 7  | 20 | 180 | -1.318 | 2 |
| 9  | 5 | 7  | 20 | 0   | 0.5523 | 3 |
| 10 | 8 | 2  | 12 | 0   | 1.3389 | 1 |
| 10 | 8 | 2  | 12 | 180 | -1.318 | 2 |
| 10 | 8 | 2  | 12 | 0   | 0.5523 | 3 |
| 10 | 8 | 11 | 28 | 0   | 1.3389 | 1 |
| 10 | 8 | 11 | 28 | 180 | -1.318 | 2 |

|    |   |    |    |     |         |   |
|----|---|----|----|-----|---------|---|
| 10 | 8 | 11 | 28 | 0   | 0.5523  | 3 |
| 10 | 8 | 11 | 29 | 0   | 1.3389  | 1 |
| 10 | 8 | 11 | 29 | 180 | -1.318  | 2 |
| 10 | 8 | 11 | 29 | 0   | 0.5523  | 3 |
| 10 | 8 | 11 | 30 | 0   | 1.3389  | 1 |
| 10 | 8 | 11 | 30 | 180 | -1.318  | 2 |
| 10 | 8 | 11 | 30 | 0   | 0.5523  | 3 |
| 11 | 8 | 2  | 12 | 0   | 1.3389  | 1 |
| 11 | 8 | 2  | 12 | 180 | -1.318  | 2 |
| 11 | 8 | 2  | 12 | 0   | 0.5523  | 3 |
| 11 | 8 | 10 | 25 | 0   | 1.3389  | 1 |
| 11 | 8 | 10 | 25 | 180 | -1.318  | 2 |
| 11 | 8 | 10 | 25 | 0   | 0.5523  | 3 |
| 11 | 8 | 10 | 26 | 0   | 1.3389  | 1 |
| 11 | 8 | 10 | 26 | 180 | -1.318  | 2 |
| 11 | 8 | 10 | 26 | 0   | 0.5523  | 3 |
| 11 | 8 | 10 | 27 | 0   | 1.3389  | 1 |
| 11 | 8 | 10 | 27 | 180 | -1.318  | 2 |
| 11 | 8 | 10 | 27 | 0   | 0.5523  | 3 |
| 12 | 2 | 3  | 13 | 0   | 0.5941  | 1 |
| 12 | 2 | 3  | 13 | 180 | -2.8995 | 2 |
| 12 | 2 | 3  | 13 | 0   | 0.6569  | 3 |
| 12 | 2 | 4  | 14 | 0   | 0.5941  | 1 |
| 12 | 2 | 4  | 14 | 180 | -2.8995 | 2 |
| 12 | 2 | 4  | 14 | 0   | 0.6569  | 3 |
| 12 | 2 | 4  | 15 | 0   | 0.5941  | 1 |
| 12 | 2 | 4  | 15 | 180 | -2.8995 | 2 |
| 12 | 2 | 4  | 15 | 0   | 0.6569  | 3 |
| 12 | 2 | 8  | 21 | 0   | 0.5941  | 1 |
| 12 | 2 | 8  | 21 | 180 | -2.8995 | 2 |
| 12 | 2 | 8  | 21 | 0   | 0.6569  | 3 |
| 13 | 3 | 1  | 31 | 0   | 1.2468  | 1 |
| 13 | 3 | 1  | 31 | 180 | -0.5774 | 2 |
| 13 | 3 | 1  | 31 | 0   | 0.7238  | 3 |
| 13 | 3 | 6  | 17 | 0   | 0.5941  | 1 |
| 13 | 3 | 6  | 17 | 180 | -2.8995 | 2 |
| 13 | 3 | 6  | 17 | 0   | 0.6569  | 3 |
| 13 | 3 | 6  | 18 | 0   | 0.5941  | 1 |
| 13 | 3 | 6  | 18 | 180 | -2.8995 | 2 |
| 13 | 3 | 6  | 18 | 0   | 0.6569  | 3 |
| 14 | 4 | 7  | 19 | 0   | 0.5941  | 1 |
| 14 | 4 | 7  | 19 | 180 | -2.8995 | 2 |
| 14 | 4 | 7  | 19 | 0   | 0.6569  | 3 |
| 14 | 4 | 7  | 20 | 0   | 0.5941  | 1 |
| 14 | 4 | 7  | 20 | 180 | -2.8995 | 2 |
| 14 | 4 | 7  | 20 | 0   | 0.6569  | 3 |
| 15 | 4 | 7  | 19 | 0   | 0.5941  | 1 |
| 15 | 4 | 7  | 19 | 180 | -2.8995 | 2 |
| 15 | 4 | 7  | 19 | 0   | 0.6569  | 3 |
| 15 | 4 | 7  | 20 | 0   | 0.5941  | 1 |
| 15 | 4 | 7  | 20 | 180 | -2.8995 | 2 |
| 15 | 4 | 7  | 20 | 0   | 0.6569  | 3 |
| 16 | 5 | 6  | 17 | 0   | 0.5941  | 1 |
| 16 | 5 | 6  | 17 | 180 | -2.8995 | 2 |
| 16 | 5 | 6  | 17 | 0   | 0.6569  | 3 |
| 16 | 5 | 6  | 18 | 0   | 0.5941  | 1 |
| 16 | 5 | 6  | 18 | 180 | -2.8995 | 2 |
| 16 | 5 | 6  | 18 | 0   | 0.6569  | 3 |
| 16 | 5 | 7  | 19 | 0   | 0.5941  | 1 |
| 16 | 5 | 7  | 19 | 180 | -2.8995 | 2 |
| 16 | 5 | 7  | 19 | 0   | 0.6569  | 3 |
| 16 | 5 | 7  | 20 | 0   | 0.5941  | 1 |
| 16 | 5 | 7  | 20 | 180 | -2.8995 | 2 |
| 16 | 5 | 7  | 20 | 0   | 0.6569  | 3 |
| 16 | 5 | 9  | 22 | 0   | 0.5941  | 1 |
| 16 | 5 | 9  | 22 | 180 | -2.8995 | 2 |
| 16 | 5 | 9  | 22 | 0   | 0.6569  | 3 |
| 16 | 5 | 9  | 23 | 0   | 0.5941  | 1 |
| 16 | 5 | 9  | 23 | 180 | -2.8995 | 2 |
| 16 | 5 | 9  | 23 | 0   | 0.6569  | 3 |
| 16 | 5 | 9  | 24 | 0   | 0.5941  | 1 |
| 16 | 5 | 9  | 24 | 180 | -2.8995 | 2 |
| 16 | 5 | 9  | 24 | 0   | 0.6569  | 3 |
| 21 | 8 | 10 | 25 | 0   | 0.5941  | 1 |
| 21 | 8 | 10 | 25 | 180 | -2.8995 | 2 |
| 21 | 8 | 10 | 25 | 0   | 0.6569  | 3 |

|    |   |    |    |     |         |   |
|----|---|----|----|-----|---------|---|
| 21 | 8 | 10 | 26 | 0   | 0.5941  | 1 |
| 21 | 8 | 10 | 26 | 180 | -2.8995 | 2 |
| 21 | 8 | 10 | 26 | 0   | 0.6569  | 3 |
| 21 | 8 | 10 | 27 | 0   | 0.5941  | 1 |
| 21 | 8 | 10 | 27 | 180 | -2.8995 | 2 |
| 21 | 8 | 10 | 27 | 0   | 0.6569  | 3 |
| 21 | 8 | 11 | 28 | 0   | 0.5941  | 1 |
| 21 | 8 | 11 | 28 | 180 | -2.8995 | 2 |
| 21 | 8 | 11 | 28 | 0   | 0.6569  | 3 |
| 21 | 8 | 11 | 29 | 0   | 0.5941  | 1 |
| 21 | 8 | 11 | 29 | 180 | -2.8995 | 2 |
| 21 | 8 | 11 | 29 | 0   | 0.6569  | 3 |
| 21 | 8 | 11 | 30 | 0   | 0.5941  | 1 |
| 21 | 8 | 11 | 30 | 180 | -2.8995 | 2 |
| 21 | 8 | 11 | 30 | 0   | 0.6569  | 3 |

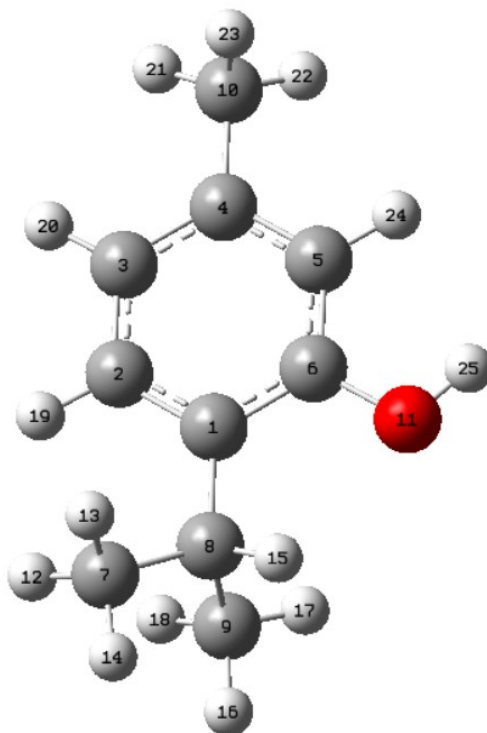

THY

| label | $q$      | $\sigma_{ii} / \text{\AA}$ | $\epsilon_{ii} / \text{kJ mol}^{-1}$ | #  |
|-------|----------|----------------------------|--------------------------------------|----|
| C2    | -0.32609 | 3.55005                    | 0.29288                              | 1  |
| C     | -0.00174 | 3.55005                    | 0.29288                              | 2  |
| C     | -0.51837 | 3.55005                    | 0.29288                              | 3  |
| C     | 0.54077  | 3.55005                    | 0.29288                              | 4  |
| C     | -0.62065 | 3.55005                    | 0.29288                              | 5  |
| C     | 0.51088  | 3.55005                    | 0.29288                              | 6  |
| C     | -0.62065 | 3.50000                    | 0.27610                              | 7  |
| C     | 0.63080  | 3.50000                    | 0.27610                              | 8  |
| C     | -0.46905 | 3.50000                    | 0.27610                              | 9  |
| C     | -0.53629 | 3.50000                    | 0.27610                              | 10 |
| O2    | -0.64051 | 3.07000                    | 0.70788                              | 11 |
| H     | 0.14172  | 2.50000                    | 0.12552                              | 12 |
| H     | 0.12843  | 2.50000                    | 0.12552                              | 13 |
| H     | 0.13852  | 2.50000                    | 0.12552                              | 14 |
| H     | -0.03549 | 2.50000                    | 0.12552                              | 15 |
| H     | 0.09171  | 2.50000                    | 0.12552                              | 16 |
| H     | 0.11706  | 2.50000                    | 0.12552                              | 17 |
| H     | 0.10186  | 2.50000                    | 0.12552                              | 18 |
| H     | 0.12642  | 2.42000                    | 0.12552                              | 19 |
| H     | 0.19804  | 2.42000                    | 0.12552                              | 20 |
| H     | 0.13668  | 2.50000                    | 0.12552                              | 21 |
| H     | 0.13847  | 2.50000                    | 0.12552                              | 22 |
| H     | 0.13970  | 2.50000                    | 0.12552                              | 23 |
| H     | 0.20587  | 2.42000                    | 0.12552                              | 24 |
| H2    | 0.43098  | 0.40000                    | 0.19246                              | 25 |

# Bonds

| Atom Numbers |    | $r_{eq} / \text{\AA}$ | $k_r / \text{kJ mol}^{-1} \text{\AA}^{-2}$ |
|--------------|----|-----------------------|--------------------------------------------|
| 7            | 8  | 1.508                 | 1282.1115                                  |
| 7            | 12 | 1.093                 | 1435.0745                                  |
| 7            | 13 | 1.093                 | 1435.0745                                  |
| 7            | 14 | 1.093                 | 1435.0745                                  |
| 8            | 9  | 1.508                 | 1282.1115                                  |
| 8            | 1  | 1.486                 | 1492.5875                                  |
| 8            | 15 | 1.093                 | 1435.0745                                  |
| 9            | 16 | 1.093                 | 1435.0745                                  |
| 9            | 17 | 1.093                 | 1435.0745                                  |
| 9            | 18 | 1.093                 | 1435.0745                                  |
| 1            | 2  | 1.374                 | 1678.0685                                  |
| 1            | 6  | 1.374                 | 1678.0685                                  |
| 2            | 3  | 1.374                 | 1678.0685                                  |
| 2            | 19 | 1.084                 | 1597.673                                   |
| 3            | 4  | 1.374                 | 1678.0685                                  |
| 3            | 20 | 1.084                 | 1597.673                                   |
| 4            | 10 | 1.486                 | 1492.5875                                  |
| 4            | 5  | 1.374                 | 1678.0685                                  |
| 10           | 21 | 1.093                 | 1435.0745                                  |
| 10           | 22 | 1.093                 | 1435.0745                                  |
| 10           | 23 | 1.093                 | 1435.0745                                  |
| 5            | 6  | 1.374                 | 1678.0685                                  |
| 5            | 24 | 1.084                 | 1597.673                                   |
| 6            | 11 | 1.376                 | 1690.4155                                  |
| 11           | 25 | 0.973                 | 2360.3745                                  |

# Angles

| Atom Numbers |    |    | $\theta_{eq} / \text{deg}$ | $k_{\theta} / \text{kJ mol}^{-1} \text{rad}^{-2}$ |
|--------------|----|----|----------------------------|---------------------------------------------------|
| 2            | 1  | 6  | 119.977                    | 402.88                                            |
| 2            | 1  | 8  | 120.419                    | 483.57                                            |
| 6            | 1  | 8  | 120.419                    | 483.57                                            |
| 1            | 2  | 3  | 119.977                    | 402.88                                            |
| 1            | 2  | 19 | 120.571                    | 339.05                                            |
| 3            | 2  | 19 | 120.571                    | 339.05                                            |
| 2            | 3  | 4  | 119.977                    | 402.88                                            |
| 2            | 3  | 20 | 120.571                    | 339.05                                            |
| 4            | 3  | 20 | 120.571                    | 339.05                                            |
| 3            | 4  | 5  | 119.977                    | 402.88                                            |
| 3            | 4  | 10 | 120.419                    | 483.57                                            |
| 5            | 4  | 10 | 120.419                    | 483.57                                            |
| 4            | 5  | 6  | 119.977                    | 402.88                                            |
| 4            | 5  | 24 | 120.571                    | 339.05                                            |
| 6            | 5  | 24 | 120.571                    | 339.05                                            |
| 1            | 6  | 5  | 119.977                    | 402.88                                            |
| 1            | 6  | 11 | 116.495                    | 582.94                                            |
| 5            | 6  | 11 | 116.495                    | 582.94                                            |
| 8            | 7  | 12 | 110.549                    | 383                                               |
| 8            | 7  | 13 | 110.549                    | 383                                               |
| 8            | 7  | 14 | 110.549                    | 383                                               |
| 12           | 7  | 13 | 108.836                    | 310.74                                            |
| 12           | 7  | 14 | 108.836                    | 310.74                                            |
| 13           | 7  | 14 | 108.836                    | 310.74                                            |
| 1            | 8  | 7  | 108.617                    | 455.27                                            |
| 1            | 8  | 9  | 108.617                    | 455.27                                            |
| 1            | 8  | 15 | 109.491                    | 377.58                                            |
| 7            | 8  | 9  | 109.608                    | 512.48                                            |
| 7            | 8  | 15 | 110.549                    | 383                                               |
| 9            | 8  | 15 | 110.549                    | 383                                               |
| 8            | 9  | 16 | 110.549                    | 383                                               |
| 8            | 9  | 17 | 110.549                    | 383                                               |
| 8            | 9  | 18 | 110.549                    | 383                                               |
| 16           | 9  | 17 | 108.836                    | 310.74                                            |
| 16           | 9  | 18 | 108.836                    | 310.74                                            |
| 17           | 9  | 18 | 108.836                    | 310.74                                            |
| 4            | 10 | 21 | 109.491                    | 377.58                                            |
| 4            | 10 | 22 | 109.491                    | 377.58                                            |
| 4            | 10 | 23 | 109.491                    | 377.58                                            |
| 21           | 10 | 22 | 108.836                    | 310.74                                            |
| 21           | 10 | 23 | 108.836                    | 310.74                                            |
| 22           | 10 | 23 | 108.836                    | 310.74                                            |
| 6            | 11 | 25 | 105.409                    | 437.2                                             |

# Dihedrals

| Atom Numbers |   |   |   | $\delta / \text{deg}$ | $k_{\phi} / \text{kJ mol}^{-1} \text{m}$ |
|--------------|---|---|---|-----------------------|------------------------------------------|
| 1            | 2 | 3 | 4 | 180                   | 14.644 2                                 |

|    |   |    |    |     |         |   |
|----|---|----|----|-----|---------|---|
| 1  | 2 | 3  | 20 | 180 | 14.644  | 2 |
| 1  | 6 | 5  | 4  | 180 | 14.644  | 2 |
| 1  | 6 | 5  | 24 | 180 | 14.644  | 2 |
| 1  | 6 | 11 | 25 | 180 | 5.8618  | 2 |
| 1  | 8 | 7  | 12 | 0   | 0.8159  | 3 |
| 1  | 8 | 7  | 13 | 0   | 0.8159  | 3 |
| 1  | 8 | 7  | 14 | 0   | 0.8159  | 3 |
| 1  | 8 | 9  | 16 | 0   | 0.8159  | 3 |
| 1  | 8 | 9  | 17 | 0   | 0.8159  | 3 |
| 1  | 8 | 9  | 18 | 0   | 0.8159  | 3 |
| 2  | 1 | 6  | 5  | 180 | 14.644  | 2 |
| 2  | 1 | 6  | 11 | 180 | 14.644  | 2 |
| 2  | 1 | 8  | 7  | 180 | 0.9414  | 2 |
| 2  | 1 | 8  | 9  | 180 | 0.9414  | 2 |
| 2  | 1 | 8  | 15 | 180 | -0.8786 | 2 |
| 2  | 1 | 8  | 15 | 0   | 0.8201  | 3 |
| 2  | 3 | 4  | 5  | 180 | 14.644  | 2 |
| 2  | 3 | 4  | 10 | 180 | 14.644  | 2 |
| 3  | 2 | 1  | 6  | 180 | 14.644  | 2 |
| 3  | 2 | 1  | 8  | 180 | 14.644  | 2 |
| 3  | 4 | 5  | 6  | 180 | 14.644  | 2 |
| 3  | 4 | 5  | 24 | 180 | 14.644  | 2 |
| 3  | 4 | 10 | 21 | 180 | -0.8786 | 2 |
| 3  | 4 | 10 | 21 | 0   | 0.8201  | 3 |
| 3  | 4 | 10 | 22 | 180 | -0.8786 | 2 |
| 3  | 4 | 10 | 22 | 0   | 0.8201  | 3 |
| 3  | 4 | 10 | 23 | 180 | -0.8786 | 2 |
| 3  | 4 | 10 | 23 | 0   | 0.8201  | 3 |
| 4  | 3 | 2  | 19 | 180 | 14.644  | 2 |
| 4  | 5 | 6  | 11 | 180 | 14.644  | 2 |
| 5  | 4 | 3  | 20 | 180 | 14.644  | 2 |
| 5  | 4 | 10 | 21 | 180 | -0.8786 | 2 |
| 5  | 4 | 10 | 21 | 0   | 0.8201  | 3 |
| 5  | 4 | 10 | 22 | 180 | -0.8786 | 2 |
| 5  | 4 | 10 | 22 | 0   | 0.8201  | 3 |
| 5  | 4 | 10 | 23 | 180 | -0.8786 | 2 |
| 5  | 4 | 10 | 23 | 0   | 0.8201  | 3 |
| 5  | 6 | 1  | 8  | 180 | 14.644  | 2 |
| 5  | 6 | 11 | 25 | 180 | 5.8618  | 2 |
| 6  | 1 | 2  | 19 | 180 | 14.644  | 2 |
| 6  | 1 | 8  | 7  | 180 | 0.9414  | 2 |
| 6  | 1 | 8  | 9  | 180 | 0.9414  | 2 |
| 6  | 1 | 8  | 15 | 180 | -0.8786 | 2 |
| 6  | 1 | 8  | 15 | 0   | 0.8201  | 3 |
| 6  | 5 | 4  | 10 | 180 | 14.644  | 2 |
| 7  | 8 | 9  | 16 | 0   | 1.3389  | 1 |
| 7  | 8 | 9  | 16 | 180 | -1.318  | 2 |
| 7  | 8 | 9  | 16 | 0   | 0.5523  | 3 |
| 7  | 8 | 9  | 17 | 0   | 1.3389  | 1 |
| 7  | 8 | 9  | 17 | 180 | -1.318  | 2 |
| 7  | 8 | 9  | 17 | 0   | 0.5523  | 3 |
| 7  | 8 | 9  | 18 | 0   | 1.3389  | 1 |
| 7  | 8 | 9  | 18 | 180 | -1.318  | 2 |
| 7  | 8 | 9  | 18 | 0   | 0.5523  | 3 |
| 8  | 1 | 2  | 19 | 180 | 14.644  | 2 |
| 8  | 1 | 6  | 11 | 180 | 14.644  | 2 |
| 9  | 8 | 7  | 12 | 0   | 1.3389  | 1 |
| 9  | 8 | 7  | 12 | 180 | -1.318  | 2 |
| 9  | 8 | 7  | 12 | 0   | 0.5523  | 3 |
| 9  | 8 | 7  | 13 | 0   | 1.3389  | 1 |
| 9  | 8 | 7  | 13 | 180 | -1.318  | 2 |
| 9  | 8 | 7  | 13 | 0   | 0.5523  | 3 |
| 9  | 8 | 7  | 14 | 0   | 1.3389  | 1 |
| 9  | 8 | 7  | 14 | 180 | -1.318  | 2 |
| 9  | 8 | 7  | 14 | 0   | 0.5523  | 3 |
| 10 | 4 | 3  | 20 | 180 | 14.644  | 2 |
| 10 | 4 | 5  | 24 | 180 | 14.644  | 2 |
| 11 | 6 | 5  | 24 | 180 | 14.644  | 2 |
| 12 | 7 | 8  | 15 | 0   | 0.5941  | 1 |
| 12 | 7 | 8  | 15 | 180 | -2.8995 | 2 |
| 12 | 7 | 8  | 15 | 0   | 0.6569  | 3 |
| 13 | 7 | 8  | 15 | 0   | 0.5941  | 1 |
| 13 | 7 | 8  | 15 | 180 | -2.8995 | 2 |
| 13 | 7 | 8  | 15 | 0   | 0.6569  | 3 |
| 14 | 7 | 8  | 15 | 0   | 0.5941  | 1 |
| 14 | 7 | 8  | 15 | 180 | -2.8995 | 2 |

|    |   |   |    |     |         |   |
|----|---|---|----|-----|---------|---|
| 14 | 7 | 8 | 15 | 0   | 0.6569  | 3 |
| 15 | 8 | 9 | 16 | 0   | 0.5941  | 1 |
| 15 | 8 | 9 | 16 | 180 | -2.8995 | 2 |
| 15 | 8 | 9 | 16 | 0   | 0.6569  | 3 |
| 15 | 8 | 9 | 17 | 0   | 0.5941  | 1 |
| 15 | 8 | 9 | 17 | 180 | -2.8995 | 2 |
| 15 | 8 | 9 | 17 | 0   | 0.6569  | 3 |
| 15 | 8 | 9 | 18 | 0   | 0.5941  | 1 |
| 15 | 8 | 9 | 18 | 180 | -2.8995 | 2 |
| 15 | 8 | 9 | 18 | 0   | 0.6569  | 3 |
| 19 | 2 | 3 | 20 | 180 | 14.644  | 2 |

# Improper

|    | Atom Numbers |   |    | $\phi_0$ / deg | $k_\phi$ / kJ mol <sup>-1</sup> |
|----|--------------|---|----|----------------|---------------------------------|
| 1  | 2            | 6 | 8  | 0              | 24.0915                         |
| 2  | 3            | 1 | 19 | 0              | 9.0291                          |
| 3  | 4            | 2 | 20 | 0              | 9.0291                          |
| 4  | 10           | 3 | 5  | 0              | 24.0915                         |
| 8  | 7            | 1 | 9  | 0              | 0                               |
| 8  | 7            | 1 | 15 | 0              | 0                               |
| 6  | 5            | 1 | 11 | 0              | 28.9031                         |
| 7  | 12           | 8 | 13 | 0              | 0                               |
| 7  | 12           | 8 | 14 | 0              | 0                               |
| 9  | 16           | 8 | 17 | 0              | 0                               |
| 9  | 16           | 8 | 18 | 0              | 0                               |
| 10 | 21           | 4 | 22 | 0              | 0                               |
| 10 | 21           | 4 | 23 | 0              | 0                               |
| 5  | 6            | 4 | 24 | 0              | 9.0291                          |

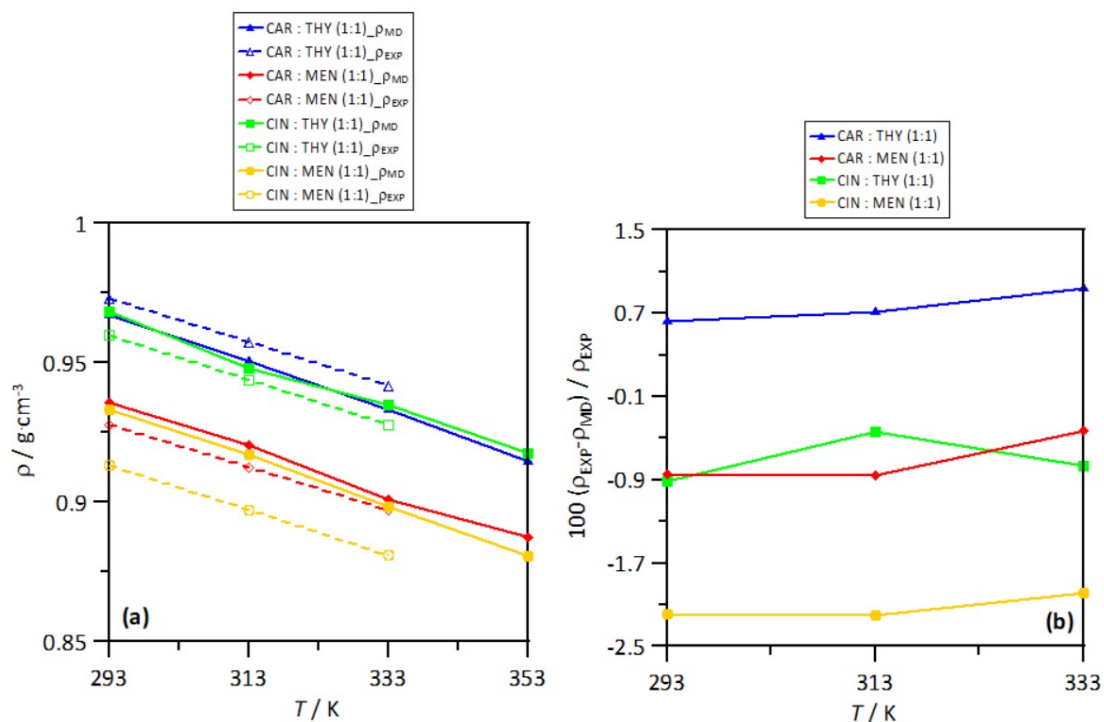

Figure S1. Comparison of experimental,  $\rho_{EXP}$ , and predicted by using MD density,  $\rho_{MD}$ , for the studied DESs at different temperatures and 0.1 MPa.  $100(\rho_{EXP} - \rho_{MD})/\rho_{EXP}$  stands for density deviations (%).

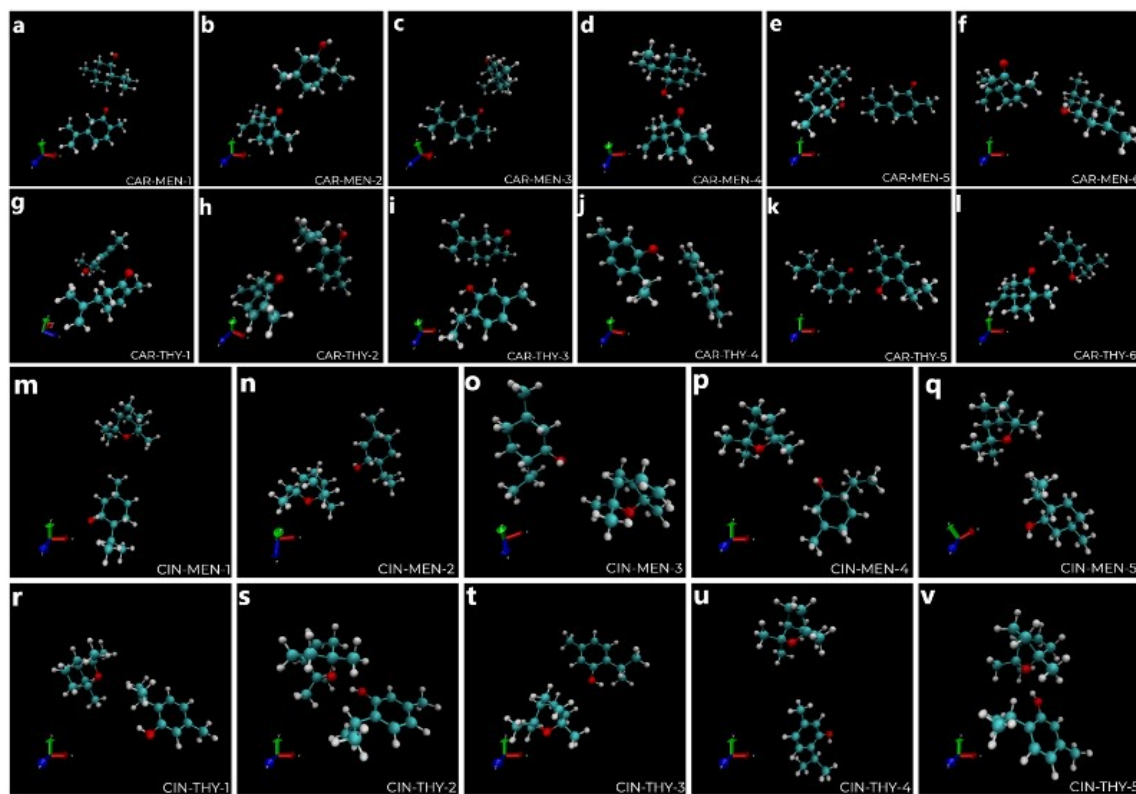

**Figure S2.** Studied NADES structures at various different spatial positions; (a-f) CAR:MEN, (g-i) CAR:THY, (m-q) CIN:MEN, and (r-v) CIN:THY cases.



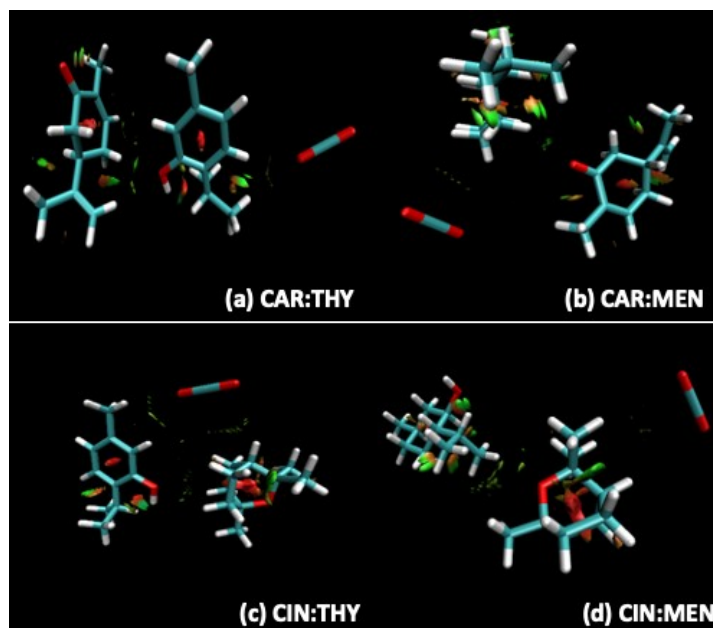

Figure S3. Reduced density gradient (RDG) isosurfaces of studied NADES+CO<sub>2</sub> systems.

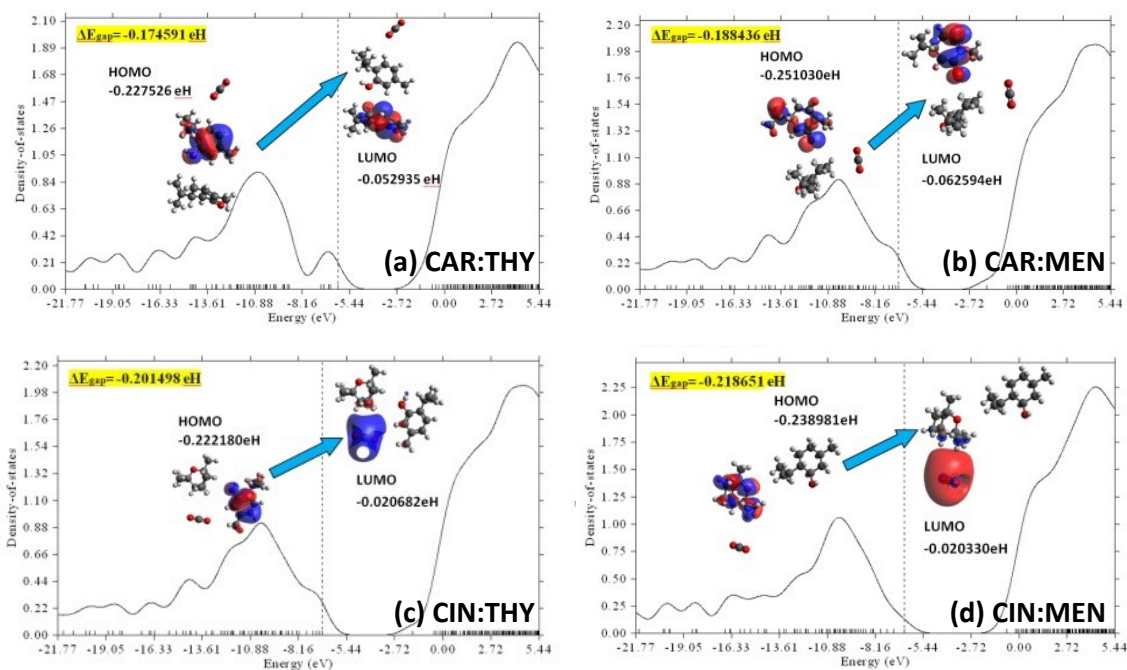

Figure S4. Density of states (DOS) plots and Homo-Lumo energy gaps for the studied NADES+CO<sub>2</sub> systems.

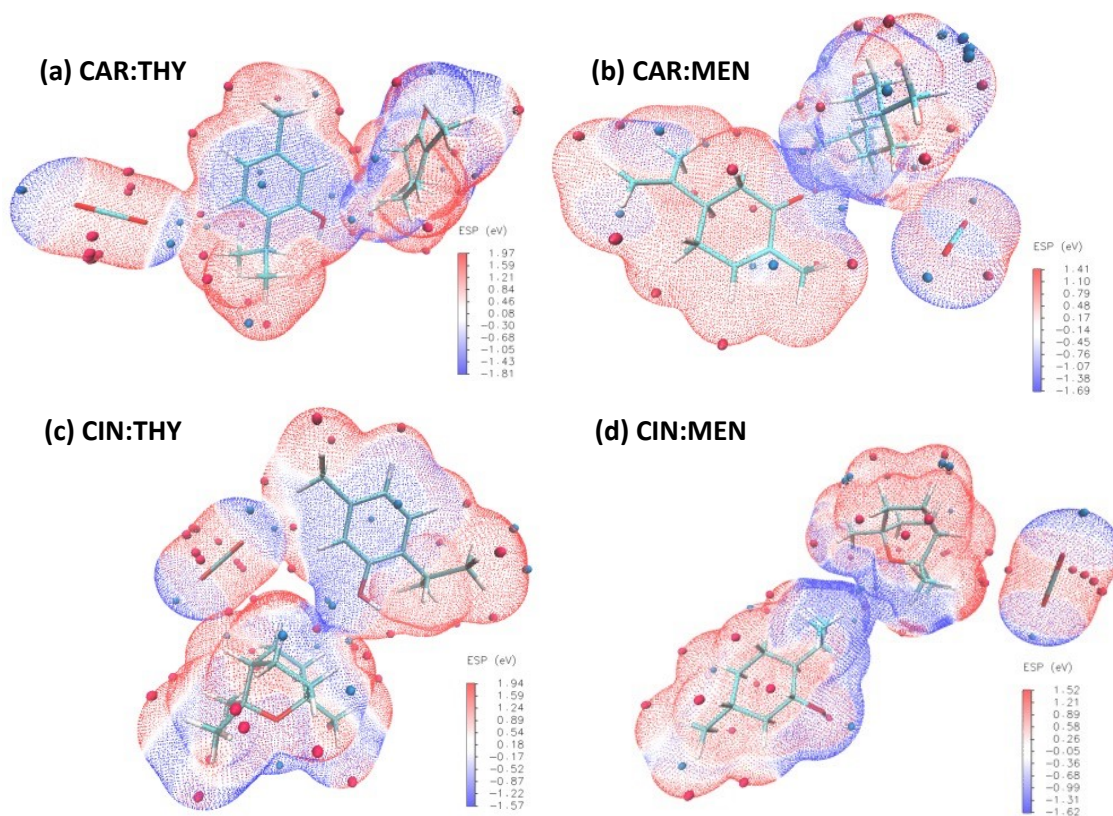

Figure S5. Electrostatic potential isosurfaces on studied NADES+CO<sub>2</sub> systems.

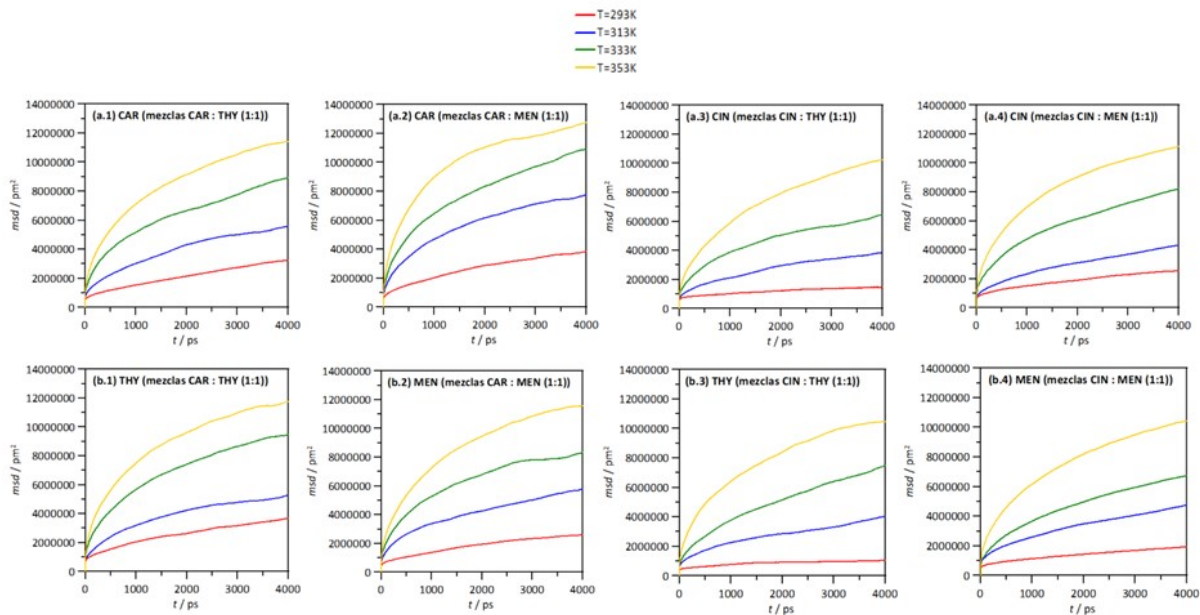

Figure S6. Mean square displacements,  $msd$ , for (a) HBA and (b) HBD for the studied DESs at different temperatures and 0.1 MPa.
